# Supplementary material for: Thermo- and mechanical-grinding-triggered color and luminescence switches of the diimine-platinum(ii) complex with 4-bromo-2,2′-bipyridine
Source: Royal Society of Chemistry journal article supplement (doi:10.1039/c3dt51936h), 2013-09-17
Supplement: c3dt51936h.pdf [file c3dt51936h.pdf]

## Supporting Information

### **Thermo- and Mechanical-Grinding-Triggered Color and Luminescence Switches of Diimine-Platinum(II) Complex with 4-Bromo-2,2'-Bipyridine**

Jun Ni,<sup>\*a, b</sup> You-Gui Wang,<sup>a</sup> Hui-Hui Wang,<sup>a</sup> Liang Xu,<sup>a</sup> Yan-Qiu Zhao,<sup>a</sup> Yu-Zhen Pan<sup>a</sup> and Jian-Jun Zhang<sup>a</sup>

<sup>a</sup>*College of Chemistry, Dalian University of Technology, 2 Lingshui Road, Dalian 116023, China,*

<sup>b</sup>*State Key Laboratory of Structural Chemistry, Fujian Institute of Research on the Structure of Matter, Chinese Academy of Sciences, Fuzhou, Fujian 350002, China.*

## Contents

|                                                                                                                                                                                                     |    |
|-----------------------------------------------------------------------------------------------------------------------------------------------------------------------------------------------------|----|
| <b>Table S1.</b> Crystal data and structure refinement of <b>1</b> ·2(CH <sub>2</sub> Cl <sub>2</sub> ) and <b>1</b> ·2(CHCl <sub>3</sub> ).....                                                    | 4  |
| <b>Table S2.</b> Selected bond lengths (Å), bond angles (°) and shortest Pt··Pt (Å) distances for <b>1</b> ·2(CH <sub>2</sub> Cl <sub>2</sub> ) and <b>1</b> ·2(CHCl <sub>3</sub> ).....            | 5  |
| <b>Table S3.</b> Hydrogen-bonding geometry (Å,°) and short interactions for <b>1</b> ·2(CH <sub>2</sub> Cl <sub>2</sub> ) and <b>1</b> ·2(CHCl <sub>3</sub> )...6                                   | 6  |
| <b>Table S4.</b> The optimized coordinates of <b>1</b> monomer by DFT method at the PBE1PBE level.....                                                                                              | 7  |
| <b>Table S5.</b> Partial molecular orbital compositions (%) in the ground state for <b>1</b> in dichloromethane solution by TD-DFT method at the PBE1PBE level.....                                 | 9  |
| <b>Table S6.</b> Absorption and emission transition properties of <b>1</b> in dichloromethane solution by TD-DFT method at the PBE1PBE level with the polarized continuum model (PCM).....          | 10 |
| <b>Table S7.</b> Partial molecular orbital compositions (%) in the ground state for solid-state <b>1</b> ·2(CH <sub>2</sub> Cl <sub>2</sub> ) by TD-DFT method at the PBE1PBE level.....            | 12 |
| <b>Table S8.</b> Absorption and emission transition properties of <b>1</b> ·2(CH <sub>2</sub> Cl <sub>2</sub> ) by TD-DFT method at the PBE1PBE level with the polarized continuum model (PCM)..... | 13 |
| <b>Table S9.</b> Partial molecular orbital compositions (%) in the ground state for solid-state <b>1</b> ·2(CHCl <sub>3</sub> ) by TD-DFT method at the PBE1PBE level.....                          | 14 |
| <b>Table S10.</b> Absorption and emission transition properties of <b>1</b> ·2(CHCl <sub>3</sub> ) by TD-DFT method at the PBE1PBE level with the polarized continuum model (PCM).....              | 15 |
| <b>Figure S1.</b> The Pt moiety plane in <b>1</b> ·2(CH <sub>2</sub> Cl <sub>2</sub> ), observed from <i>a</i> axis direction. The solvate molecules are omitted for clarity.....                   | 17 |

|                                                                                                                                                                                                                                                                        |    |
|------------------------------------------------------------------------------------------------------------------------------------------------------------------------------------------------------------------------------------------------------------------------|----|
| <b>Figure S2.</b> The Pt moiety plane in <b>1</b> ·2(CHCl <sub>3</sub> ), observed from <i>a</i> axis direction.....                                                                                                                                                   | 18 |
| <b>Figure S3.</b> The Br···Cl interactions between platinum moieties and solvate CHCl <sub>3</sub> molecules in <b>1</b> ·2(CHCl <sub>3</sub> ). Hydrogen atoms on platinum moieties are omitted for clarity.....                                                      | 19 |
| <b>Figure S4.</b> The hydrogen bonds between solvate molecules and platinum moieties in <b>1</b> ·2(CH <sub>2</sub> Cl <sub>2</sub> ) (a) and <b>1</b> ·2(CHCl <sub>3</sub> ) (b). Hydrogen atoms not participating in the hydrogen bonds are omitted for clarity..... | 20 |
| <b>Figure S5.</b> Low-energy absorption (dash lines) and emission spectra (solid lines) of <b>1</b> in various solvents at ambient temperature.....                                                                                                                    | 21 |
| <b>Figure S6.</b> Liquid state emission spectra of <b>1</b> in various solvents at ambient temperature.....                                                                                                                                                            | 22 |
| <b>Figure S7.</b> Liquid state emission spectra of <b>1</b> in CH <sub>2</sub> Cl <sub>2</sub> solution with different concentration at ambient temperature.....                                                                                                       | 23 |
| <b>Figure S8.</b> The XRD diagrams of (a) <b>1</b> ·2(CH <sub>2</sub> Cl <sub>2</sub> ) and (b) <b>1</b> ·2(CHCl <sub>3</sub> ) after heated at 100°C for 1 hour.....                                                                                                  | 24 |
| <b>Figure S9.</b> Optimized structure of <b>1</b> in the ground state by DFT method at the PBE1PBE level.....                                                                                                                                                          | 24 |
| <b>Figure S10.</b> Calculated (blue vertical bars) and measured (black line) UV-vis absorption spectra of <b>1</b> in dichloromethane solution at ambient temperature.....                                                                                             | 25 |
| <b>Figure S11.</b> Plots of the frontier molecular orbitals involved in the absorption of <b>1</b> in dichloromethane solution (isovalue = 0.02).....                                                                                                                  | 26 |
| <b>Figure S12.</b> Calculated (blue vertical bars) and measured (black line) UV-vis absorption spectra of solid state <b>1</b> ·2(CH <sub>2</sub> Cl <sub>2</sub> ) at ambient temperature.....                                                                        | 28 |
| <b>Figure S13.</b> Calculated (blue vertical bars) and measured (black line) UV-vis absorption spectra of                                                                                                                                                              |    |

|                                                                                                                                                                                                                                                                                                                                                                                                                                 |    |
|---------------------------------------------------------------------------------------------------------------------------------------------------------------------------------------------------------------------------------------------------------------------------------------------------------------------------------------------------------------------------------------------------------------------------------|----|
| solid state $1 \cdot 2(\text{CHCl}_3)$ at ambient temperature.....                                                                                                                                                                                                                                                                                                                                                              | 29 |
| <b>Figure S14.</b> Plots of the frontier molecular orbitals involved in the absorption of $1 \cdot 2(\text{CH}_2\text{Cl}_2)$ in solid state (isovalue = 0.02).....                                                                                                                                                                                                                                                             | 30 |
| <b>Figure S15.</b> Plots of the frontier molecular orbitals involved in the absorption of $1 \cdot 2(\text{CHCl}_3)$ in solid state (isovalue = 0.02).....                                                                                                                                                                                                                                                                      | 32 |
| <b>Figure S16.</b> The XRD diagrams recorded in a reversible heating-absorbing cycle, showing dynamic variations of XRD patterns from b)-e) in the heating process of $1 \cdot 2(\text{CH}_2\text{Cl}_2)$ , and the XRD patterns from e)-i) in the reversed process by exposing heated sample into $\text{CH}_2\text{Cl}_2$ vapor at ambient temperature. a) The simulated pattern of $1 \cdot 2(\text{CH}_2\text{Cl}_2)$ ..... | 34 |
| <b>Figure S17.</b> Thermogravimetric analysis curves of crystalline species $1 \cdot 2(\text{CH}_2\text{Cl}_2)$ and $1 \cdot 2(\text{CHCl}_3)$ after heated at $100^\circ\text{C}$ for 1 hour.....                                                                                                                                                                                                                              | 35 |
| <b>Figure S18.</b> Emission spectra of ground sample <b>1</b> upon exposure to various VOC vapors at ambient temperature.....                                                                                                                                                                                                                                                                                                   | 36 |
| <b>Figure S19.</b> Thermogravimetric analysis curves of crystalline $1 \cdot 2(\text{CH}_2\text{Cl}_2)$ (black) and the corresponding ground species (red).....                                                                                                                                                                                                                                                                 | 37 |
| <b>Figure S20.</b> Thermogravimetric analysis curves of crystalline $1 \cdot 2(\text{CHCl}_3)$ (black) and the corresponding ground species (red).....                                                                                                                                                                                                                                                                          | 38 |
| <b>Figure S21.</b> The emission spectra of heated-sample of $1 \cdot 2(\text{CH}_2\text{Cl}_2)$ after ground and heated-sample of $1 \cdot 2(\text{CHCl}_3)$ after ground (red line).....                                                                                                                                                                                                                                       | 39 |

**Table S1.** Crystal data and structure refinement of **1·2(CH<sub>2</sub>Cl<sub>2</sub>)** and **1·2(CHCl<sub>3</sub>)**.

|                                                             | <b>1·2(CH<sub>2</sub>Cl<sub>2</sub>)</b>                            | <b>1·2(CHCl<sub>3</sub>)</b>                                        |
|-------------------------------------------------------------|---------------------------------------------------------------------|---------------------------------------------------------------------|
| Empirical formula                                           | C <sub>28</sub> H <sub>21</sub> BrCl <sub>4</sub> N <sub>2</sub> Pt | C <sub>28</sub> H <sub>19</sub> BrCl <sub>6</sub> N <sub>2</sub> Pt |
| <i>M</i>                                                    | 802.27                                                              | 871.15                                                              |
| Crystal system                                              | monoclinic                                                          | monoclinic                                                          |
| Space group                                                 | <i>P2<sub>1</sub>/c</i>                                             | <i>P2<sub>1</sub>/c</i>                                             |
| <i>a</i> / Å                                                | 7.684(2)                                                            | 7.7725(4)                                                           |
| <i>b</i> / Å                                                | 22.104(3)                                                           | 21.7699(12)                                                         |
| <i>c</i> / Å                                                | 17.567(3)                                                           | 18.8391(8)                                                          |
| <i>α</i> / °                                                | 90                                                                  | 90                                                                  |
| <i>β</i> / °                                                | 95.756(2)                                                           | 94.510(2)                                                           |
| <i>γ</i> / °                                                | 90                                                                  | 90                                                                  |
| <i>V</i> / Å <sup>3</sup>                                   | 2968.7(10)                                                          | 3177.8(3)                                                           |
| <i>Z</i>                                                    | 4                                                                   | 4                                                                   |
| <i>D<sub>c</sub></i> / g.cm <sup>-3</sup>                   | 1.795                                                               | 1.819                                                               |
| <i>μ</i> (mm <sup>-1</sup> )                                | 6.453                                                               | 6.198                                                               |
| Radiation ( <i>λ</i> , Å)                                   | 0.71073                                                             | 0.71073                                                             |
| <i>T</i> / K                                                | 296                                                                 | 296                                                                 |
| <i>F</i> (000)                                              | 1536                                                                | 1660                                                                |
| <i>R</i> <sub>int</sub>                                     | 0.075                                                               | 0.034                                                               |
| Reflections collected / uniques                             | 14368 / 5202                                                        | 14104 / 5562                                                        |
| Observed reflections ( <i>I</i> > 2σ( <i>I</i> ))           | 3299                                                                | 4055                                                                |
| <i>R</i> 1 <sup><i>a</i></sup> ( <i>I</i> > 2σ( <i>I</i> )) | 0.0546                                                              | 0.0568                                                              |
| <i>wR</i> 2 <sup><i>b</i></sup> (all data)                  | 0.1482                                                              | 0.1740                                                              |
| GOF                                                         | 1.007                                                               | 1.042                                                               |

$${}^a R1 = \sum |F_o - F_c| / \sum F_o, \quad {}^b wR2 = \sum [w(F_o^2 - F_c^2)^2] / \sum [w(F_o^2)]^{1/2}$$

**Table S2.** Selected bond lengths (Å), bond angles (°) and shortest Pt...Pt (Å) distances for **1·2(CH<sub>2</sub>Cl<sub>2</sub>)** and **1·2(CHCl<sub>3</sub>)**.

|                           | <b>1·2(CH<sub>2</sub>Cl<sub>2</sub>)</b> | <b>1·2(CHCl<sub>3</sub>)</b> |
|---------------------------|------------------------------------------|------------------------------|
| Shortest Pt...Pt distance | 4.911                                    | 4.982                        |
| Pt1-N                     | 2.066(9)                                 | 2.070(8)                     |
|                           | 2.063(9)                                 | 2.074(9)                     |
| Pt1-C                     | 1.966(13)                                | 1.971(12)                    |
|                           | 1.941(12)                                | 1.973(13)                    |
| N-Pt1-N                   | 79.3(4)                                  | 78.6 (4)                     |
| C-Pt1-N                   | 93.9(4)                                  | 95.6(4)                      |
| C-Pt1-N                   | 95.1(4)                                  | 94.0(4)                      |
| C-Pt1-C                   | 91.7(4)                                  | 9.18(4)                      |

**Table S3** Hydrogen-bonding geometry (Å,°) and short interactions for 1·2(CH<sub>2</sub>Cl<sub>2</sub>) and 1·2(CHCl<sub>3</sub>).

| 1·2(CH <sub>2</sub> Cl <sub>2</sub> )                                                                                                                                                                     |                 |               |                                |                         |                  |
|-----------------------------------------------------------------------------------------------------------------------------------------------------------------------------------------------------------|-----------------|---------------|--------------------------------|-------------------------|------------------|
| <i>D</i> -H... <i>A</i>                                                                                                                                                                                   | <i>D</i> -H     | H... <i>A</i> | <i>D</i> ... <i>A</i>          | <i>D</i> -H... <i>A</i> | Symmetry code    |
| C01-H01A... $\pi$ (C19≡C20)                                                                                                                                                                               | 0.97            | 2.86          | 3.414                          | 117                     | x,y,z            |
| C01-H01B... $\pi$ (C11≡C12)                                                                                                                                                                               | 0.97            | 2.66          | 3.628                          | 174                     | x,y,z            |
| C16-H16...Br1                                                                                                                                                                                             | 0.93            | 2.97          | 3.566                          | 123                     | 1-x,1/2+y,3/2-z  |
|                                                                                                                                                                                                           | center...center |               |                                |                         | center...center  |
| $\pi$ (Cg1)... $\pi$ (Cg3')                                                                                                                                                                               | 3.956           |               | $\pi$ (C11≡C12)... $\pi$ (Cg2) | 3.403                   |                  |
| Cg1 is the pyridine ring containing N2 atom, Cg2 is the pyridine ring containing N1, Cg3' is the benzene ring containing C13 with symmetry code (1-x,1-y,1-z).                                            |                 |               |                                |                         |                  |
| 1·2(CHCl <sub>3</sub> )                                                                                                                                                                                   |                 |               |                                |                         |                  |
| <i>D</i> -H... <i>A</i>                                                                                                                                                                                   | <i>D</i> -H     | H... <i>A</i> | <i>D</i> ... <i>A</i>          | <i>D</i> -H... <i>A</i> | Symmetry code    |
| C01-H01... $\pi$ (C11≡C12)                                                                                                                                                                                | 0.98            | 2.73          | 3.554                          | 142                     | x,y,z            |
| C01-H01... $\pi$ (C19≡C20)                                                                                                                                                                                | 0.98            | 2.86          | 3.594                          | 132                     | x,y,z            |
| C02-H02... $\pi$ (Cg)                                                                                                                                                                                     | 0.98            | 2.71          | 3.648                          | 162                     | 1-x,-1/2+y,3/2-z |
| Br1...Cl3                                                                                                                                                                                                 | 3.367 (x,y,z)   |               | Br1'...Cl3                     | 3.489 (x,3/2-y,-1/2+z)  |                  |
|                                                                                                                                                                                                           | center...center |               |                                | center...center         |                  |
| $\pi$ (Cg1)... $\pi$ (Cg3')                                                                                                                                                                               | 3.978           |               | $\pi$ (C19≡C20)... $\pi$ (Cg2) | 3.420                   |                  |
| Cg is the benzene ring containing C13 atom, Cg1 is the pyridine ring containing N1 atom, Cg2 is the pyridine ring containing N2, Cg3' is the benzene ring containing C21 with symmetry code (-x,1-y,1-z). |                 |               |                                |                         |                  |

**Table S4.** The optimized coordinates of **1** monomer by DFT method at the PBE1PBE level.

| Atom | Coordinates (Angstroms) |             |             |
|------|-------------------------|-------------|-------------|
|      | X                       | Y           | Z           |
| Pt   | 0.34075100              | -0.33008000 | -0.01064000 |
| Br   | -6.37105900             | -0.07428600 | 0.05513000  |
| C    | 0.70603200              | 1.57184000  | -0.00161000 |
| N    | -0.27078000             | -2.32673900 | -0.03206000 |
| C    | 1.04188400              | 4.20089000  | 0.02708000  |
| N    | -1.73628900             | -0.14275900 | -0.00582000 |
| C    | -3.77845800             | 1.09360300  | 0.03348000  |
| H    | -4.27810800             | 2.05466300  | 0.05154000  |
| C    | 2.24176100              | -0.69610100 | -0.00478000 |
| C    | -1.60933100             | -2.52916900 | -0.03602000 |
| C    | -2.42880000             | -1.30516800 | -0.01131000 |
| C    | 1.42585600              | 6.98494900  | 0.09412000  |
| H    | 1.57497600              | 8.06061900  | 0.11972000  |
| C    | 4.82027000              | -1.30632300 | -0.01454000 |
| C    | -1.27517200             | -4.90681900 | -0.08757000 |
| H    | -1.67241300             | -5.91661900 | -0.11034000 |
| C    | 3.42850000              | -1.00253200 | 0.00176000  |
| C    | 0.84714300              | 2.78926000  | 0.00072000  |
| C    | -2.13698100             | -3.81847800 | -0.06412000 |
| H    | -3.20936100             | -3.97428800 | -0.06962000 |
| C    | 0.09724800              | -4.68143000 | -0.08286000 |
| H    | 0.80628800              | -5.50168000 | -0.10170000 |
| C    | -3.82148000             | -1.31149700 | 0.00675000  |
| H    | -4.37892000             | -2.23936700 | 0.00539000  |
| C    | 7.07662100              | -0.78032400 | -0.74215000 |
| H    | 7.75564100              | -0.13528500 | -1.29319000 |



|   |             |             |             |
|---|-------------|-------------|-------------|
| C | -4.49533900 | -0.09820700 | 0.02906000  |
| C | 5.71937100  | -0.48666300 | -0.72022000 |
| H | 5.33196100  | 0.38024700  | -1.24616000 |
| C | -2.39485800 | 1.02297200  | 0.01631000  |
| H | -1.76197800 | 1.90711100  | 0.02082000  |
| C | 0.63936500  | 6.40908000  | -0.90148000 |
| H | 0.17411600  | 7.03594000  | -1.65753000 |
| C | 0.56195900  | -3.37471000 | -0.05541000 |
| H | 1.61800900  | -3.11800100 | -0.05218000 |
| C | 1.83633400  | 4.79419900  | 1.02418000  |
| H | 2.30296400  | 4.15639900  | 1.76836000  |
| C | 2.02237500  | 6.17034900  | 1.05468000  |
| H | 2.63993500  | 6.61050900  | 1.83296000  |
| C | 0.44653400  | 5.03363000  | -0.93654000 |
| H | -0.16070600 | 4.58329000  | -1.71625000 |
| C | 6.69024900  | -2.71034400 | 0.64457000  |
| H | 7.06645900  | -3.57686400 | 1.18184000  |
| C | 7.56964000  | -1.89208500 | -0.06144000 |
| H | 8.63204000  | -2.11787500 | -0.07918000 |
| C | 5.33104000  | -2.42398300 | 0.66839000  |
| H | 4.64649900  | -3.05772300 | 1.22476000  |

---

**Table S5.** Partial molecular orbital compositions (%) in the ground state for **1** in dichloromethane solution by TD-DFT method at the PBE1PBE level.

| Orbital | Energy (eV) | MO Contribution (%) |                      |       |
|---------|-------------|---------------------|----------------------|-------|
|         |             | Pt                  | 4-Br-2,2'-bipyridine | C≡CPh |
| LUMO+10 | 0.41        | 53.4(24/33/43)      | 21.9                 | 24.7  |
| LUMO+5  | -0.14       | 9.4(77/10/13)       | 80.8                 | 9.8   |
| LUMO+4  | -0.34       | 4.9(9/22/69)        | 6.0                  | 89.1  |
| LUMO+3  | -0.57       | 15.6(0/68/32)       | 6.2                  | 78.2  |
| LUMO+2  | -1.31       | 1.7(0/26/74)        | 97.3                 | 1.0   |
| LUMO+1  | -1.61       | 2.4(0/66/34)        | 96.4                 | 1.2   |
| LUMO    | -2.59       | 4.4(0/47/53)        | 92.5                 | 3.1   |
| HOMO    | -5.75       | 17.7(0/0/99)        | 1.6                  | 80.7  |
| HOMO-1  | -5.97       | 15.8(0/5/94)        | 4.1                  | 80.1  |
| HOMO-2  | -6.34       | 32.1(0/1/99)        | 3.3                  | 64.6  |
| HOMO-3  | -6.68       | 18.7(0/2/98)        | 5.4                  | 75.9  |
| HOMO-4  | -6.91       | 96.2(38/0/72)       | 0.7                  | 3.1   |
| HOMO-5  | -7.14       | 0(26/9/65)          | 0                    | 100   |
| HOMO-7  | -7.67       | 19.3(0/1/99)        | 49.3                 | 31.4  |
| HOMO-8  | -7.79       | 11.7(0/0/99)        | 69.2                 | 19.1  |
| HOMO-9  | -7.98       | 19.9(0/1/99)        | 9.6                  | 70.5  |

**Table S6.** Absorption and emission transition properties of **1** in dichloromethane solution by TD-DFT method at the PBE1PBE level with the polarized continuum model (PCM).

| States          | $E$ , nm<br>(eV) | O.S.   | Component     | Contri. | Assignment                                            | Measured<br>Wavelength<br>(nm) |
|-----------------|------------------|--------|---------------|---------|-------------------------------------------------------|--------------------------------|
| T <sub>1</sub>  | 539<br>(2.30)    | 0.0000 | HOMO→LUMO     | 96%     | <sup>3</sup> LLCT/ <sup>3</sup> MLCT                  | 580                            |
| T <sub>2</sub>  | 499<br>(2.49)    | 0.0000 | HOMO-1→LUMO   | 92%     | <sup>3</sup> LLCT/ <sup>3</sup> MLCT                  |                                |
| S <sub>1</sub>  | 511<br>(2.43)    | 0.0538 | HOMO→LUMO     | 100%    | <sup>1</sup> LLCT/ <sup>1</sup> MLCT                  |                                |
| S <sub>2</sub>  | 463<br>(2.68)    | 0.1954 | HOMO-1→LUMO   | 100%    | <sup>1</sup> LLCT/ <sup>1</sup> MLCT                  | 450                            |
| S <sub>3</sub>  | 432<br>(2.87)    | 0.0391 | HOMO-2→LUMO   | 100%    | <sup>1</sup> LLCT/ <sup>1</sup> MLCT                  | 415                            |
| S <sub>8</sub>  | 330<br>(3.75)    | 0.1281 | HOMO→LUMO+2   | 80%     | <sup>1</sup> LLCT/ <sup>1</sup> MLCT                  |                                |
|                 |                  |        | HOMO-1→LUMO+1 | 18%     | <sup>1</sup> LLCT/ <sup>1</sup> MLCT                  |                                |
| S <sub>14</sub> | 289<br>(4.29)    | 0.8981 | HOMO→LUMO+3   | 49%     | <sup>1</sup> IL/ <sup>1</sup> MC                      | 290                            |
|                 |                  |        | HOMO-7→LUMO   | 46%     | <sup>1</sup> LLCT/ <sup>1</sup> MLCT/ <sup>1</sup> IL |                                |
|                 |                  |        | HOMO-2→LUMO+2 | 5%      | <sup>1</sup> LLCT/ <sup>1</sup> MLCT                  |                                |
| S <sub>18</sub> | 284<br>(4.37)    | 0.3063 | HOMO-8→LUMO   | 74%     | <sup>1</sup> LLCT/ <sup>1</sup> MLCT/ <sup>1</sup> IL |                                |
|                 |                  |        | HOMO-3→LUMO+1 | 23%     | <sup>1</sup> LLCT/ <sup>1</sup> MLCT                  |                                |
| S <sub>19</sub> | 274<br>(4.53)    | 0.1053 | HOMO-2→LUMO+3 | 46%     | <sup>1</sup> IL/ <sup>1</sup> MC                      |                                |
|                 |                  |        | HOMO-1→LUMO+3 | 29%     | <sup>1</sup> IL/ <sup>1</sup> MC                      |                                |
|                 |                  |        | HOMO-3→LUMO+2 | 15%     | <sup>1</sup> LLCT/ <sup>1</sup> MLCT                  |                                |
| S <sub>21</sub> | 271<br>(4.57)    | 0.3061 | HOMO-1→LUMO+3 | 33%     | <sup>1</sup> IL/ <sup>1</sup> MC                      |                                |
|                 |                  |        | HOMO→LUMO+4   | 20%     | <sup>1</sup> IL                                       |                                |
|                 |                  |        | HOMO-3→LUMO+2 | 18%     | <sup>1</sup> LLCT/ <sup>1</sup> MLCT                  |                                |
|                 |                  |        | HOMO-2→LUMO+3 | 13%     | <sup>1</sup> IL/ <sup>1</sup> MC                      |                                |
|                 |                  |        | HOMO-9→LUMO   | 11%     | <sup>1</sup> LLCT/ <sup>1</sup> MLCT                  |                                |

|                 |               |        |               |     |                                                                           |     |
|-----------------|---------------|--------|---------------|-----|---------------------------------------------------------------------------|-----|
| S <sub>26</sub> | 257<br>(4.81) | 0.2530 | HOMO→LUMO+4   | 31% | <sup>1</sup> IL                                                           | 269 |
|                 |               |        | HOMO→LUMO+10  | 21% | <sup>1</sup> MC/ <sup>1</sup> MLCT/ <sup>1</sup> LLCT/<br><sup>1</sup> IL |     |
|                 |               |        | HOMO→LUMO+5   | 21% | <sup>1</sup> LLCT/ <sup>1</sup> MLCT                                      |     |
|                 |               |        | HOMO-9→LUMO   | 11% | <sup>1</sup> LLCT/ <sup>1</sup> MLCT                                      |     |
|                 |               |        | HOMO-3→LUMO+3 | 7%  | <sup>1</sup> IL/ <sup>1</sup> MC                                          |     |

---

IL denotes intraligand  $\pi \rightarrow \pi^*$  transition of 4-Br-2,2'-bipyridine or  $C \equiv CC_6H_5$  ligand; LLCT denotes  $\pi(C \equiv CC_6H_5) \rightarrow \pi^*(4-Brbpy)$  state; MLCT denotes  $5d(Pt) \rightarrow \pi^*(4-Brbpy)$  state; MC denotes metal-centered transition.

**Table S7.** Partial molecular orbital compositions (%) in the ground state for solid-state **1**·2(CH<sub>2</sub>Cl<sub>2</sub>) by TD-DFT method at the PBE1PBE level.

| Orbital | Energy (eV) | MO Contribution (%) |                      |       |
|---------|-------------|---------------------|----------------------|-------|
|         |             | Pt (s/p/d)          | 4-Br-2,2'-bipyridine | C≡CPh |
| LUMO+5  | -1.20       | 2.9(45/31/24)       | 77.5                 | 19.6  |
| LUMO+4  | -1.30       | 3.3(39/44/17)       | 94.2                 | 2.5   |
| LUMO+3  | -1.50       | 3.1(4/62/33)        | 95.5                 | 1.4   |
| LUMO+2  | -1.61       | 5.4(39/49/12)       | 92.5                 | 2.1   |
| LUMO+1  | -2.38       | 3.9(11/24/65)       | 93.0                 | 3.1   |
| LUMO    | -2.45       | 5.6(13/51/36)       | 90.6                 | 3.8   |
| HOMO    | -5.44       | 19.0(0/2/98)        | 3.0                  | 78.0  |
| HOMO-1  | -5.46       | 19.5(1/1/98)        | 2.4                  | 78.1  |
| HOMO-2  | -5.69       | 22.2(0/5/95)        | 5.1                  | 72.7  |
| HOMO-3  | -5.75       | 21.0(0/5/95)        | 5.1                  | 74.0  |
| HOMO-4  | -6.06       | 31.4(2/2/96)        | 2.9                  | 65.7  |
| HOMO-5  | -6.07       | 29.8(0/2/98)        | 3.1                  | 67.1  |
| HOMO-6  | -6.45       | 78.6(28/0/72)       | 9.0                  | 12.4  |
| HOMO-7  | -6.50       | 84.7(27/0/72)       | 8.5                  | 6.8   |
| HOMO-14 | -7.14       | 28.7(0/0/99)        | 16.0                 | 55.3  |
| HOMO-15 | -7.21       | 29.0(0/0/100)       | 14.0                 | 57.0  |
| HOMO-16 | -7.42       | 42.9(0/0/100)       | 10.9                 | 46.2  |

**Table S8.** Absorption and emission transition properties of **1**·2(CH<sub>2</sub>Cl<sub>2</sub>) by TD-DFT method at the PBE1PBE level with the polarized continuum model (PCM).

| States          | <i>E</i> , nm<br>(eV) | O.S.   | Component      | Contri. | Assignment                                            | Measured<br>Wavelength<br>(nm) |
|-----------------|-----------------------|--------|----------------|---------|-------------------------------------------------------|--------------------------------|
| T <sub>1</sub>  | 579<br>(2.14)         | 0.0000 | HOMO→LUMO      | 81%     | <sup>3</sup> LLCT/ <sup>3</sup> MLCT                  | 549                            |
|                 |                       |        | HOMO-1→LUMO+1  | 19%     | <sup>3</sup> LLCT/ <sup>3</sup> MLCT                  |                                |
| T <sub>2</sub>  | 574<br>(2.16)         | 0.0000 | HOMO-1→LUMO    | 58%     | <sup>3</sup> LLCT/ <sup>3</sup> MLCT                  |                                |
|                 |                       |        | HOMO→LUMO+1    | 42%     | <sup>3</sup> LLCT/ <sup>3</sup> MLCT                  |                                |
| S <sub>1</sub>  | 541<br>(2.29)         | 0.0000 | HOMO→LUMO      | 82%     | <sup>1</sup> LLCT/ <sup>1</sup> MLCT                  |                                |
|                 |                       |        | HOMO-1→LUMO+1  | 14%     | <sup>1</sup> LLCT/ <sup>1</sup> MLCT                  |                                |
| S <sub>2</sub>  | 535<br>(2.32)         | 0.0772 | HOMO-1→LUMO    | 57%     | <sup>1</sup> LLCT/ <sup>1</sup> MLCT                  | 505                            |
|                 |                       |        | HOMO→LUMO+1    | 43%     | <sup>1</sup> LLCT/ <sup>1</sup> MLCT                  |                                |
| S <sub>8</sub>  | 469<br>(2.64)         | 0.0967 | HOMO-2→LUMO+1  | 72%     | <sup>1</sup> LLCT/ <sup>1</sup> MLCT                  | 474                            |
|                 |                       |        | HOMO-3→LUMO    | 15%     | <sup>1</sup> LLCT/ <sup>1</sup> MLCT                  |                                |
| S <sub>10</sub> | 444<br>(2.79)         | 0.0823 | HOMO-5→LUMO    | 62%     | <sup>1</sup> LLCT/ <sup>1</sup> MLCT                  | 420                            |
|                 |                       |        | HOMO-4→LUMO+1  | 26%     | <sup>1</sup> LLCT/ <sup>1</sup> MLCT                  |                                |
| S <sub>32</sub> | 343<br>(3.61)         | 0.1296 | HOMO-1→LUMO+4  | 38%     | <sup>1</sup> LLCT/ <sup>1</sup> MLCT                  | 331                            |
|                 |                       |        | HOMO-2→LUMO+3  | 29%     | <sup>1</sup> LLCT/ <sup>1</sup> MLCT                  |                                |
|                 |                       |        | HOMO→LUMO+5    | 14%     | <sup>1</sup> LLCT/ <sup>1</sup> MLCT/ <sup>1</sup> IL |                                |
|                 |                       |        | HOMO-5→LUMO+2  | 11%     | <sup>1</sup> LLCT/ <sup>1</sup> MLCT                  |                                |
| S <sub>51</sub> | 308<br>(4.01)         | 0.0451 | HOMO-14→LUMO   | 43%     | <sup>1</sup> LLCT/ <sup>1</sup> MLCT                  | 312                            |
|                 |                       |        | HOMO-4→LUMO+5  | 18%     | <sup>1</sup> LLCT/ <sup>1</sup> MLCT/ <sup>1</sup> IL |                                |
|                 |                       |        | HOMO-5→LUMO+4  | 16%     | <sup>1</sup> LLCT/ <sup>1</sup> MLCT/ <sup>1</sup> IL |                                |
|                 |                       |        | HOMO-15→LUMO+1 | 10%     | <sup>1</sup> LLCT/ <sup>1</sup> MLCT/ <sup>1</sup> IL |                                |
| S <sub>56</sub> | 299<br>(4.15)         | 0.0383 | HOMO-6→LUMO+3  | 36%     | <sup>1</sup> LLCT/ <sup>1</sup> MLCT                  | 301                            |
|                 |                       |        | HOMO-7→LUMO+4  | 22%     | <sup>1</sup> LLCT/ <sup>1</sup> MLCT                  |                                |
|                 |                       |        | HOMO-7→LUMO+2  | 15%     | <sup>1</sup> MLCT                                     |                                |
|                 |                       |        | HOMO-16→LUMO   | 10%     | <sup>1</sup> LLCT/ <sup>1</sup> MLCT/ <sup>1</sup> IL |                                |

**Table S9.** Partial molecular orbital compositions (%) in the ground state for solid-state **1**·2(CHCl<sub>3</sub>) by TD-DFT method at the PBE1PBE level.

| Orbital | Energy (eV) | MO Contribution (%) |                      |       |
|---------|-------------|---------------------|----------------------|-------|
|         |             | Pt (s/p/d)          | 4-Br-2,2'-bipyridine | C≡CPh |
| LUMO+5  | -0.86       | 3.2(41/33/26)       | 94.2                 | 2.6   |
| LUMO+4  | -1.04       | 6.6(30/58/12)       | 89.4                 | 4.0   |
| LUMO+3  | -1.61       | 2.4(11/55/34)       | 95.3                 | 2.3   |
| LUMO+2  | -1.63       | 2.8(37/43/20)       | 97.2                 | 2.3   |
| LUMO+1  | -2.43       | 4.1(13/19/67)       | 93.7                 | 2.2   |
| LUMO    | -2.52       | 5.8(13/49/38)       | 90.1                 | 4.1   |
| HOMO    | -5.55       | 18.6(1/2/97)        | 2.4                  | 79.0  |
| HOMO-1  | -5.57       | 18.8(1/1/98)        | 1.8                  | 79.4  |
| HOMO-2  | -5.76       | 21.8(0/5/95)        | 6.0                  | 72.2  |
| HOMO-3  | -5.79       | 22.3(0/6/94)        | 5.0                  | 72.7  |
| HOMO-4  | -6.15       | 33.1(3/2/95)        | 3.6                  | 63.3  |
| HOMO-5  | -6.17       | 31.6(0/2/97)        | 3.1                  | 65.3  |
| HOMO-6  | -6.46       | 82.6(27/0/72)       | 10.5                 | 6.9   |
| HOMO-7  | -6.50       | 86.2(27/0/73)       | 9.5                  | 4.3   |
| HOMO-9  | -6.63       | 9.7(7/4/89)         | 2.6                  | 87.7  |
| HOMO-12 | -6.98       | 0.7(2/4/94)         | 0.2                  | 99.1  |
| HOMO-14 | -7.33       | 33.9(1/0/99)        | 16.9                 | 49.2  |
| HOMO-16 | -7.40       | 31.6(0/0/99)        | 12.3                 | 56.1  |
| HOMO-17 | -7.52       | 45.0(0/0/100)       | 10.0                 | 45.0  |

**Table S10.** Absorption and emission transition properties of **1**·2(CHCl<sub>3</sub>) by TD-DFT method at the PBE1PBE level with the polarized continuum model (PCM).

| States          | <i>E</i> , nm<br>(eV) | O.S.   | Component     | Contri. | Assignment                           | Measured<br>Wavelength<br>(nm) |
|-----------------|-----------------------|--------|---------------|---------|--------------------------------------|--------------------------------|
| T <sub>1</sub>  | 568<br>(2.18)         | 0.0000 | HOMO→LUMO     | 80%     | <sup>3</sup> LLCT/ <sup>3</sup> MLCT | 549                            |
|                 |                       |        | HOMO-1→LUMO+1 | 15%     | <sup>3</sup> LLCT/ <sup>3</sup> MLCT |                                |
| T <sub>2</sub>  | 561<br>(2.21)         | 0.0000 | HOMO-1→LUMO   | 58%     | <sup>3</sup> LLCT/ <sup>3</sup> MLCT |                                |
|                 |                       |        | HOMO→LUMO+1   | 42%     | <sup>3</sup> LLCT/ <sup>3</sup> MLCT |                                |
| S <sub>1</sub>  | 534<br>(2.32)         | 0.0000 | HOMO→LUMO     | 88%     | <sup>1</sup> LLCT/ <sup>1</sup> MLCT |                                |
|                 |                       |        | HOMO-1→LUMO+1 | 12%     | <sup>1</sup> LLCT/ <sup>1</sup> MLCT |                                |
|                 |                       |        | HOMO-3→LUMO   | 4%      | <sup>1</sup> LLCT/ <sup>1</sup> MLCT |                                |
| S <sub>2</sub>  | 529<br>(2.34)         | 0.0721 | HOMO-1→LUMO   | 70%     | <sup>1</sup> LLCT/ <sup>1</sup> MLCT | 497                            |
|                 |                       |        | HOMO→LUMO+1   | 30%     | <sup>1</sup> LLCT/ <sup>1</sup> MLCT |                                |
| S <sub>5</sub>  | 483<br>(2.56)         | 0.0769 | HOMO-2→LUMO   | 74%     | <sup>1</sup> LLCT/ <sup>1</sup> MLCT |                                |
|                 |                       |        | HOMO→LUMO+1   | 13%     | <sup>1</sup> LLCT/ <sup>1</sup> MLCT |                                |
|                 |                       |        | HOMO-1→LUMO   | 11%     | <sup>1</sup> LLCT/ <sup>1</sup> MLCT |                                |
| S <sub>8</sub>  | 463<br>(2.68)         | 0.0526 | HOMO-3→LUMO+1 | 81%     | <sup>1</sup> LLCT/ <sup>1</sup> MLCT | 465                            |
| S <sub>10</sub> | 439<br>(2.83)         | 0.0943 | HOMO-5→LUMO   | 67%     | <sup>1</sup> LLCT/ <sup>1</sup> MLCT | 420                            |
|                 |                       |        | HOMO-4→LUMO+1 | 21%     | <sup>1</sup> LLCT/ <sup>1</sup> MLCT |                                |
|                 |                       |        | HOMO-3→LUMO+1 | 8%      | <sup>1</sup> LLCT/ <sup>1</sup> MLCT |                                |
| S <sub>18</sub> | 374<br>(3.31)         | 0.0606 | HOMO-6→LUMO+1 | 54%     | <sup>1</sup> IL/ <sup>1</sup> MLCT   |                                |
|                 |                       |        | HOMO-7→LUMO   | 40%     | <sup>1</sup> MLCT                    |                                |
| S <sub>26</sub> | 355<br>(3.49)         | 0.0921 | HOMO-2→LUMO+2 | 52%     | <sup>1</sup> LLCT/ <sup>1</sup> MLCT |                                |
|                 |                       |        | HOMO-9→LUMO+1 | 27%     | <sup>1</sup> LLCT                    |                                |
|                 |                       |        | HOMO-3→LUMO+3 | 15%     | <sup>1</sup> LLCT/ <sup>1</sup> MLCT |                                |
| S <sub>34</sub> | 325<br>(3.82)         | 0.0281 | HOMO-1→LUMO+4 | 73%     | <sup>1</sup> LLCT/ <sup>1</sup> MLCT | 329                            |
|                 |                       |        | HOMO-2→LUMO+4 | 20%     | <sup>1</sup> LLCT/ <sup>1</sup> MLCT |                                |



|                 |               |        |                |     |                                                       |     |
|-----------------|---------------|--------|----------------|-----|-------------------------------------------------------|-----|
| S <sub>37</sub> | 315<br>(3.93) | 0.0491 | HOMO-2→LUMO+4  | 72% | <sup>1</sup> LLCT/ <sup>1</sup> MLCT                  | 312 |
|                 |               |        | HOMO-1→LUMO+4  | 23% | <sup>1</sup> LLCT/ <sup>1</sup> MLCT                  |     |
| S <sub>47</sub> | 304<br>(4.08) | 0.0387 | HOMO-14→LUMO   | 54% | <sup>1</sup> LLCT/ <sup>1</sup> MLCT/ <sup>1</sup> IL | 302 |
|                 |               |        | HOMO-12→LUMO   | 20% | <sup>1</sup> LLCT                                     |     |
|                 |               |        | HOMO-16→LUMO+1 | 15% | <sup>1</sup> LLCT/ <sup>1</sup> MLCT/ <sup>1</sup> IL |     |
|                 |               |        | HOMO-17→LUMO   | 7%  | <sup>1</sup> LLCT/ <sup>1</sup> MLCT/ <sup>1</sup> IL |     |
|                 |               |        | HOMO-3→LUMO+5  | 4%  | <sup>1</sup> LLCT/ <sup>1</sup> MLCT                  |     |

---

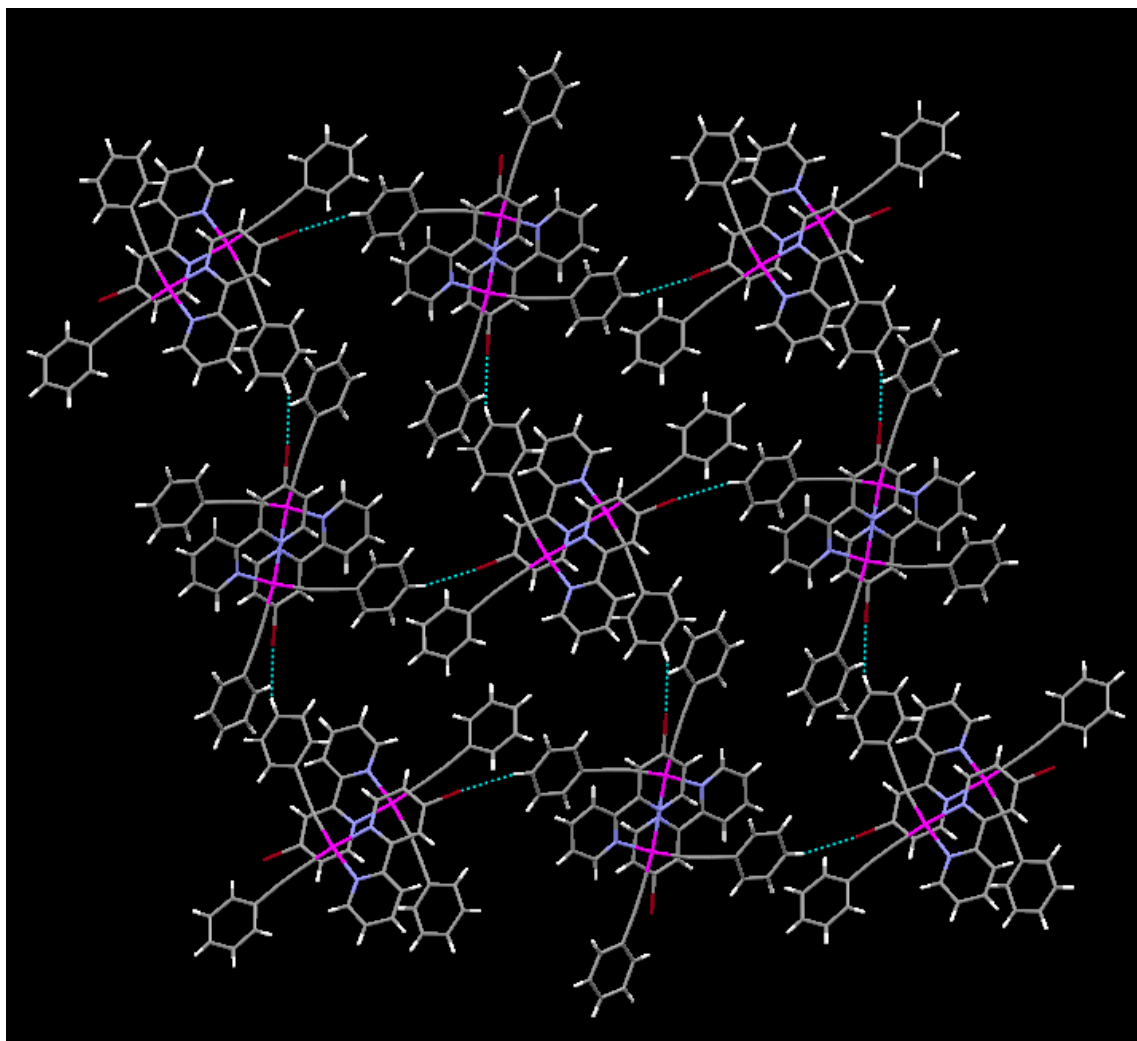

**Figure S1.** The Pt moiety plane in  $1 \cdot 2(\text{CH}_2\text{Cl}_2)$ , observed from  $a$  axis direction. The solvate molecules are omitted for clarity.

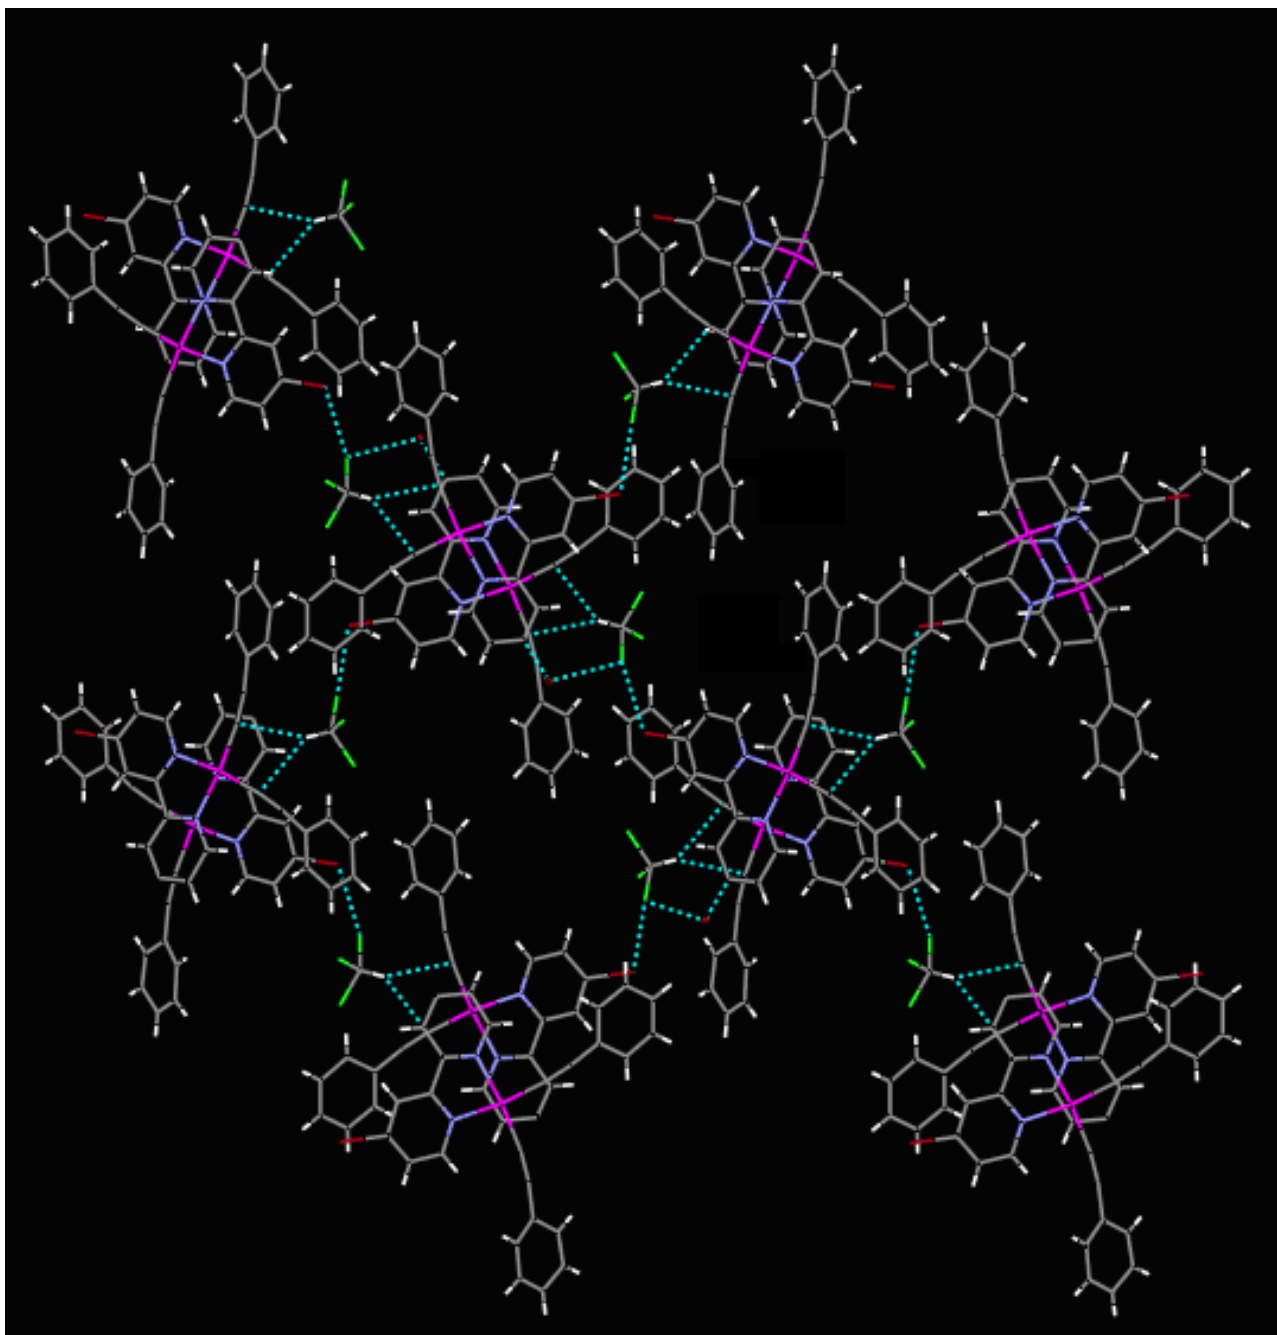

**Figure S2.** The Pt moiety plane in  $1 \cdot 2(\text{CHCl}_3)$ , observed from *a* axis direction.

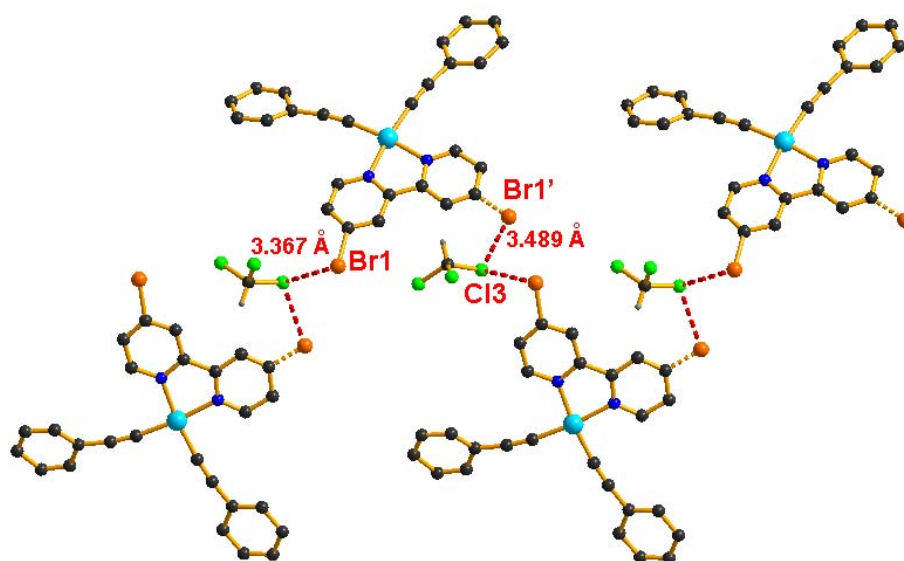

**Figure S3.** The Br $\cdots$ Cl interactions between platinum moieties and solvate CHCl<sub>3</sub> molecules in 1·2(CHCl<sub>3</sub>). Hydrogen atoms on platinum moieties are omitted for clarity.

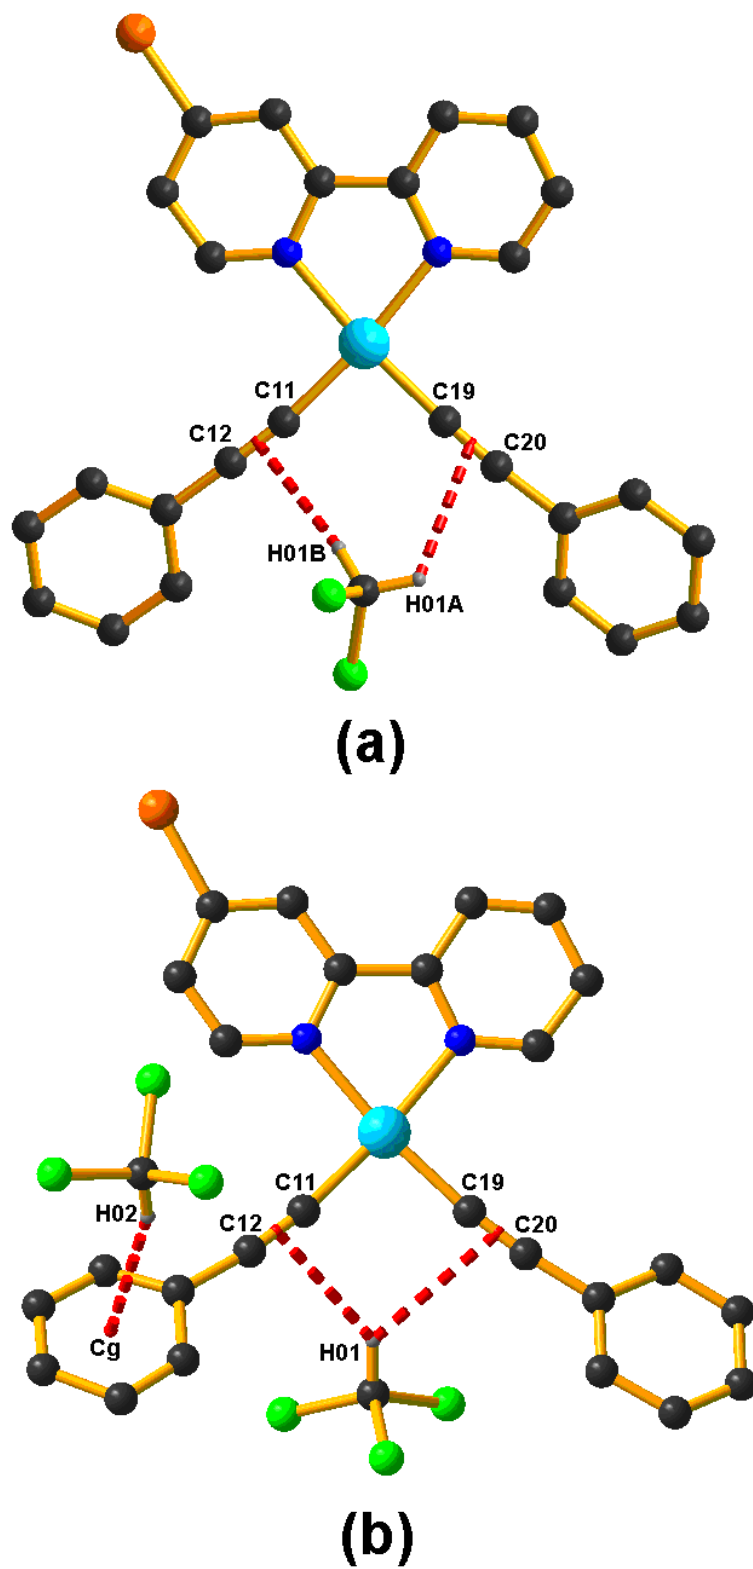

**Figure S4.** The hydrogen bonds between solvate molecules and platinum moieties in  $1 \cdot 2(\text{CH}_2\text{Cl}_2)$  (a) and  $1 \cdot 2(\text{CHCl}_3)$  (b). Hydrogen atoms not participating in the hydrogen bonds are omitted for clarity.

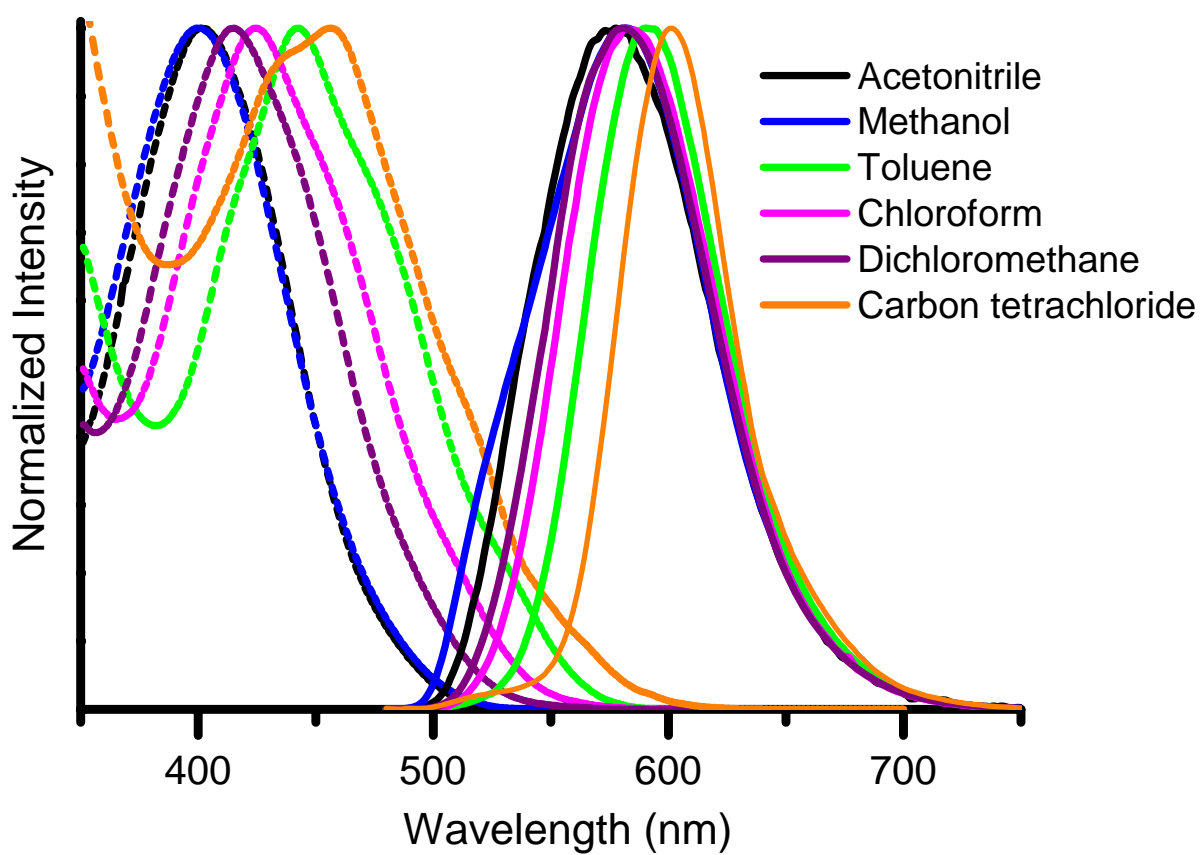

**Figure S5.** Low-energy absorption (dash lines) and emission spectra (solid lines) of **1** in various solvents at ambient temperature.

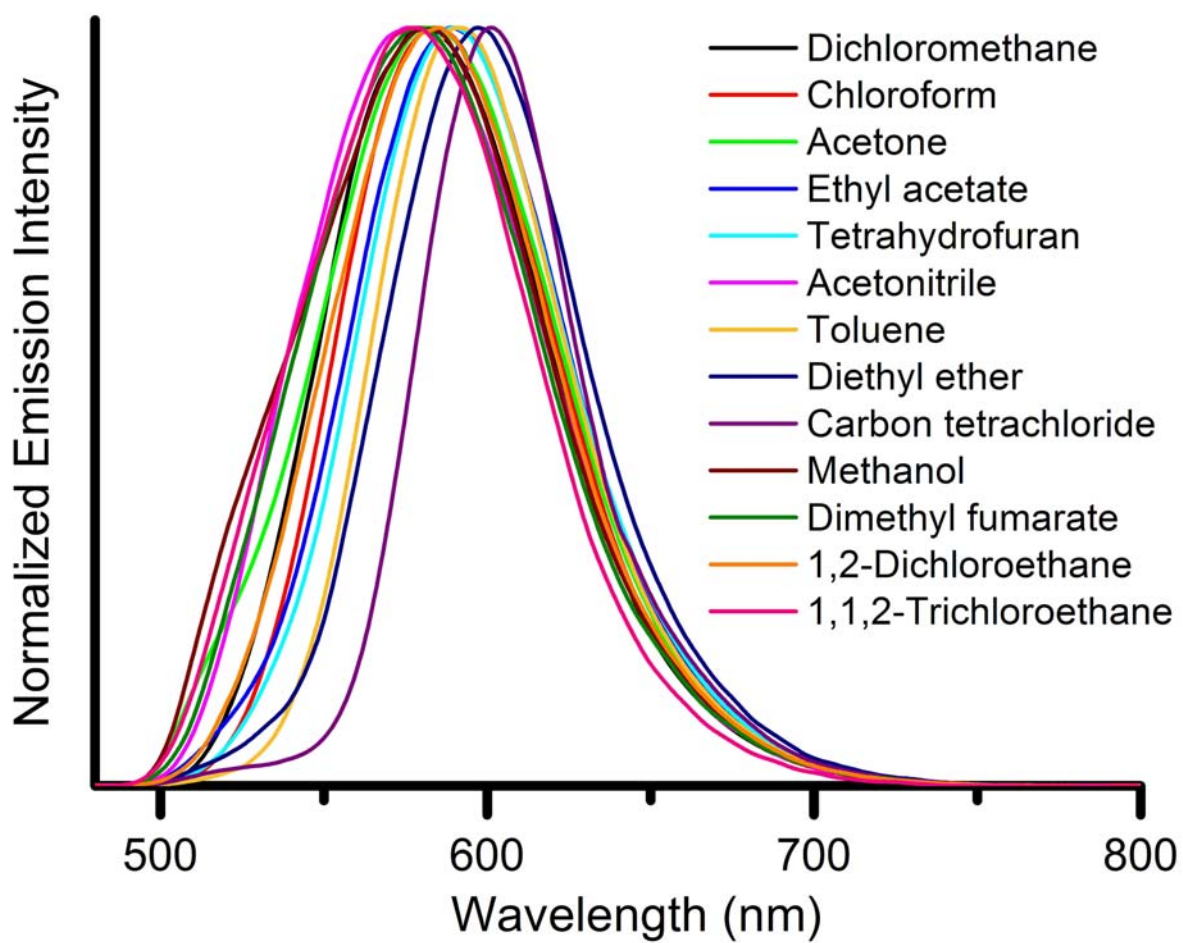

**Figure S6.** Liquid state emission spectra of **1** in various solvents at ambient temperature.

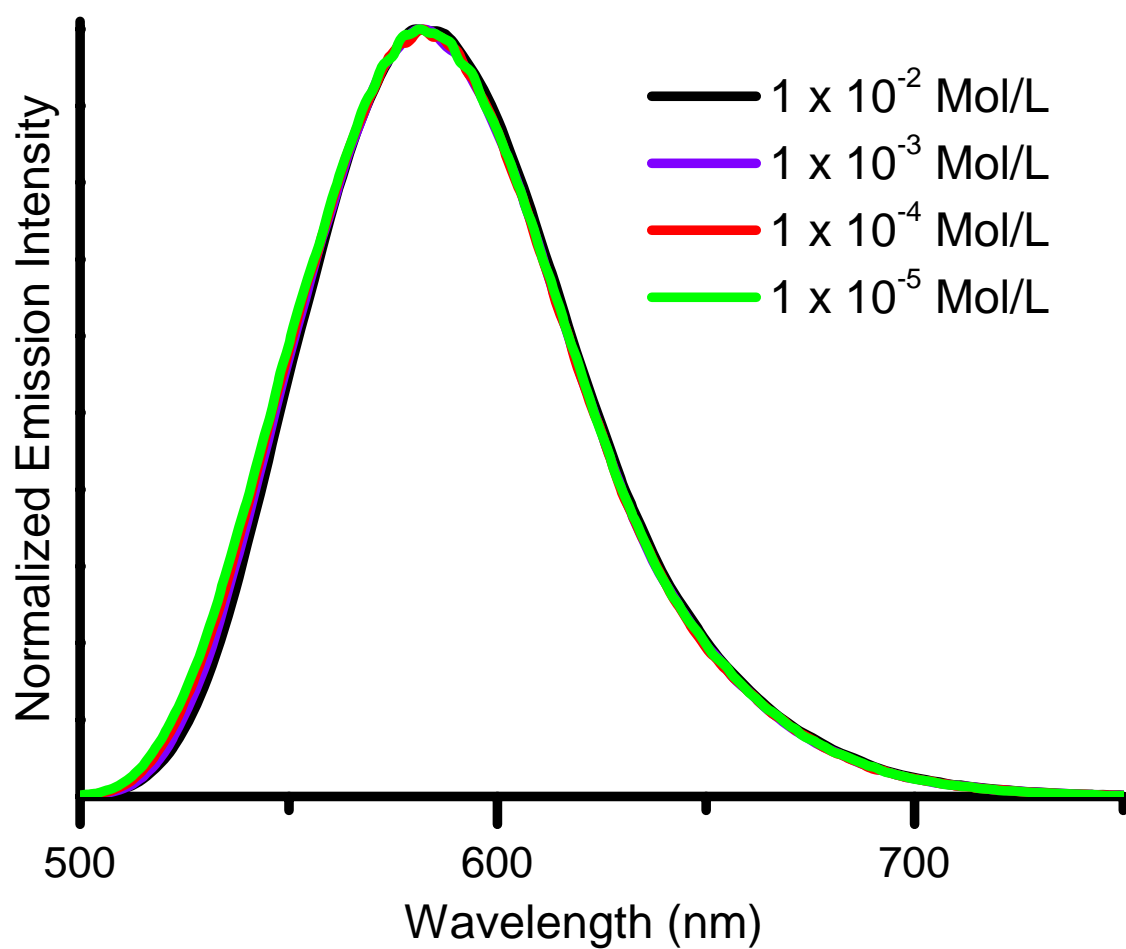

**Figure S7.** Liquid state emission spectra of **1** in CH<sub>2</sub>Cl<sub>2</sub> solution with different concentration at ambient temperature.



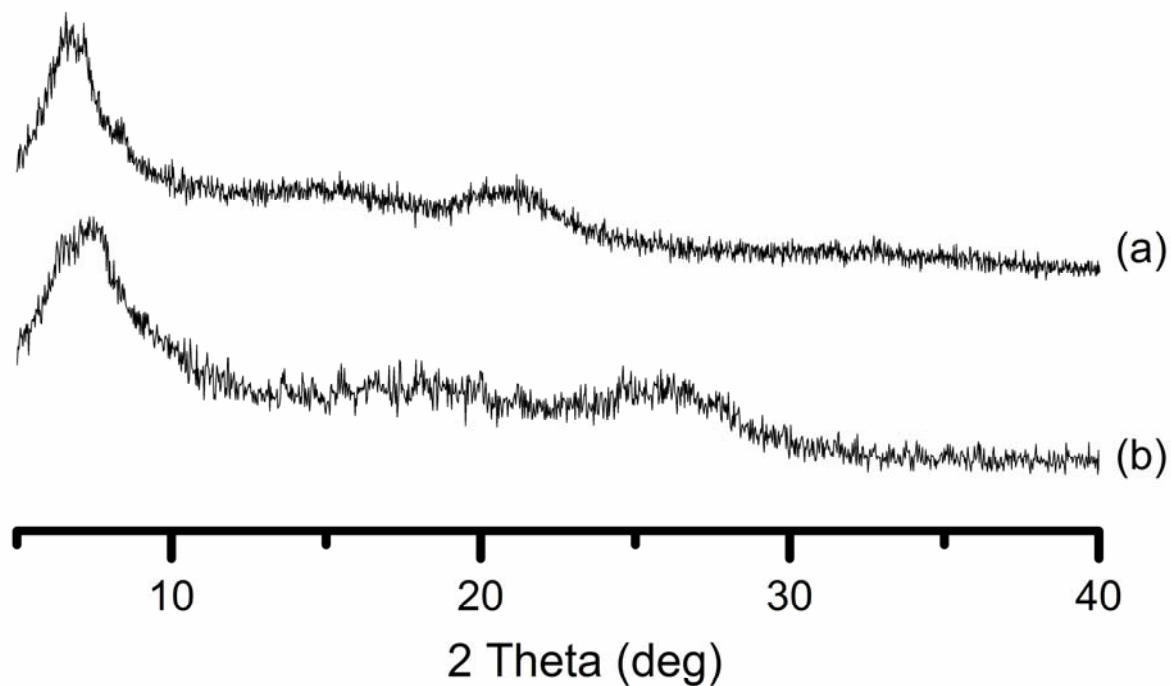

**Figure S8.** The XRD diagrams of (a)  $1 \cdot 2(\text{CH}_2\text{Cl}_2)$  and (b)  $1 \cdot 2(\text{CHCl}_3)$  after heated at  $100^\circ\text{C}$  for 1 hour.

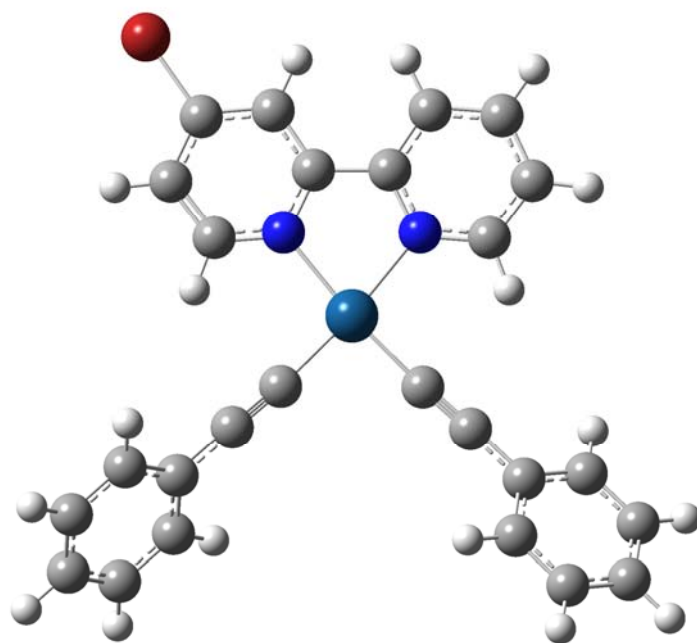

**Figure S9.** Optimized structure of **1** in the ground state by DFT method at the PBE1PBE level.

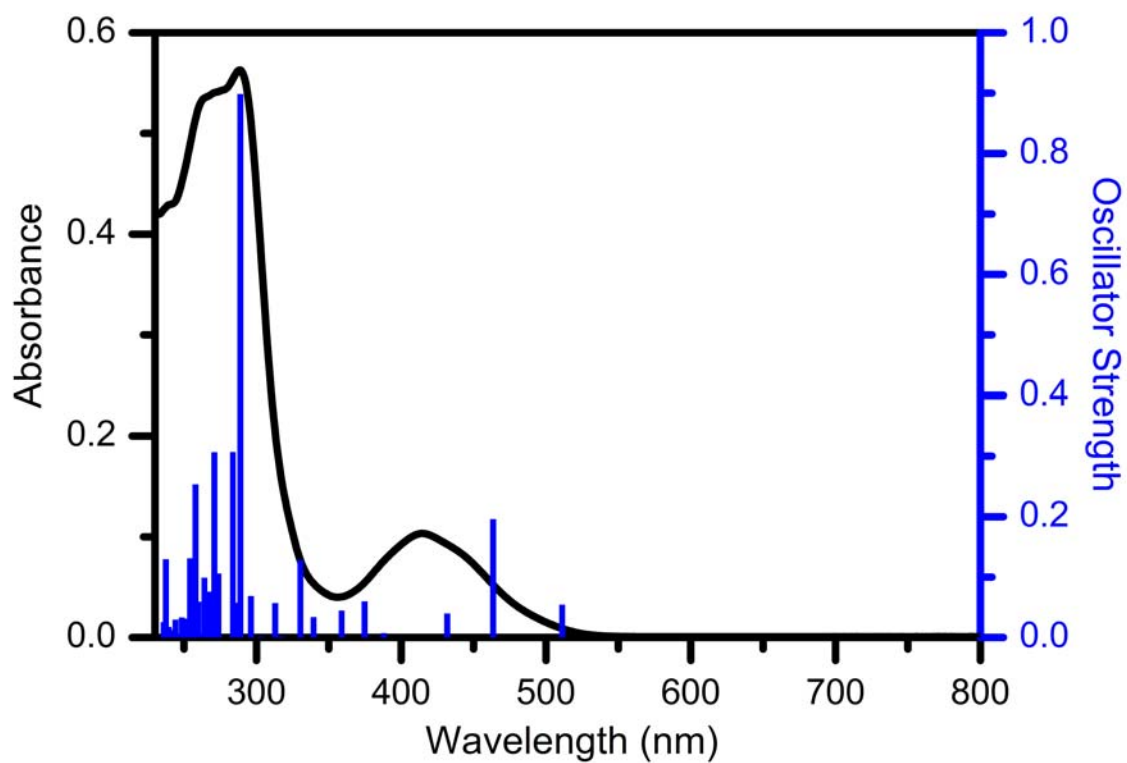

**Figure S10.** Calculated (blue vertical bars) and measured (black line) UV-vis absorption spectra of **1** in dichloromethane solution at ambient temperature.

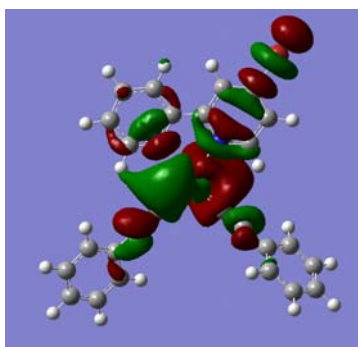

LUMO+10

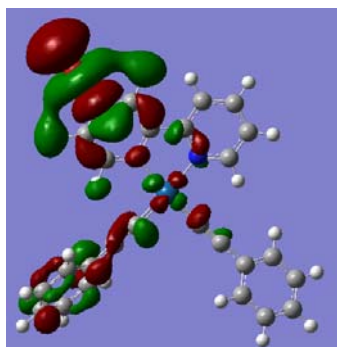

LUMO+5

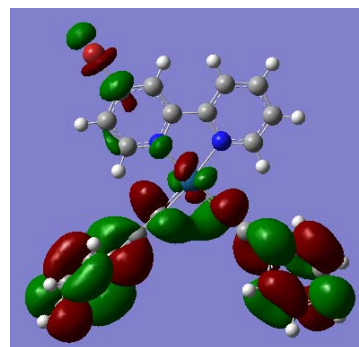

LUMO+4

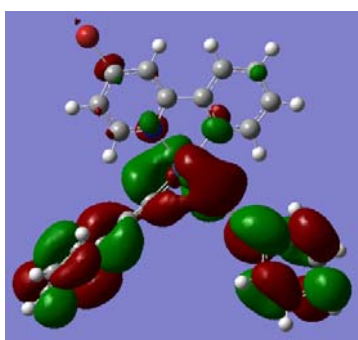

LUMO+3

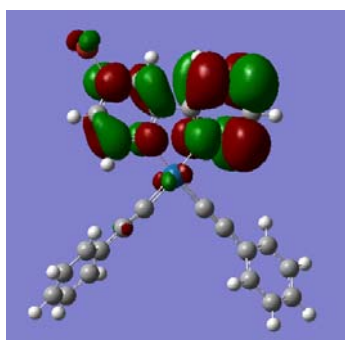

LUMO+2

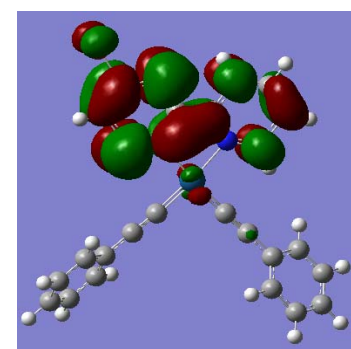

LUMO+1

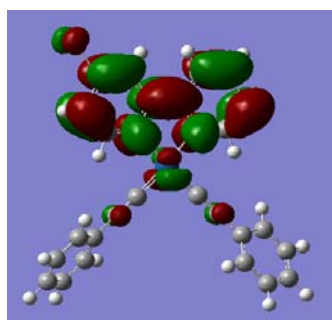

LUMO

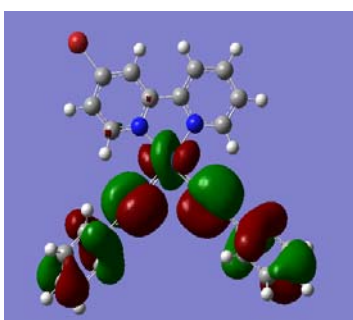

HOMO

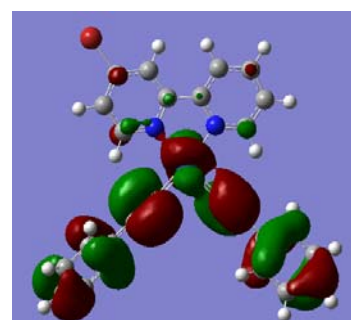

HOMO-1

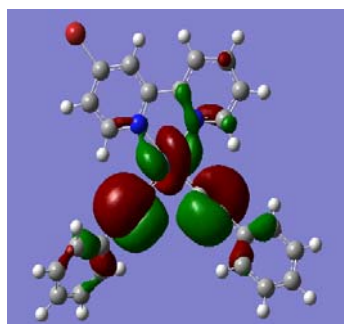

HOMO-2

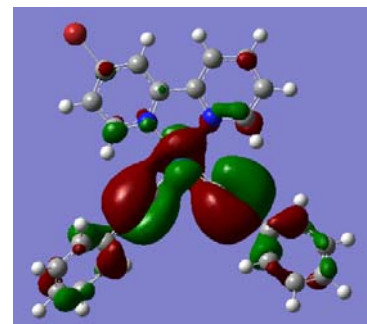

HOMO-3

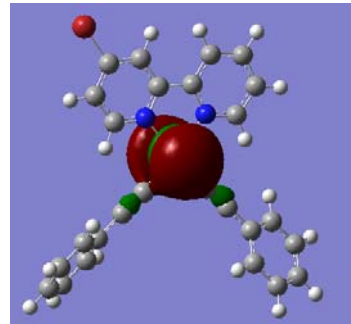

HOMO-4

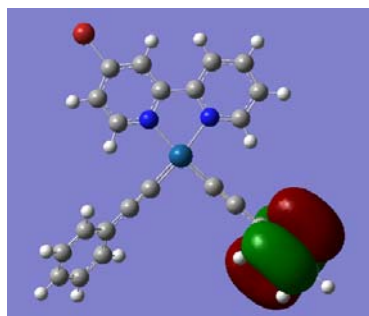

HOMO-5

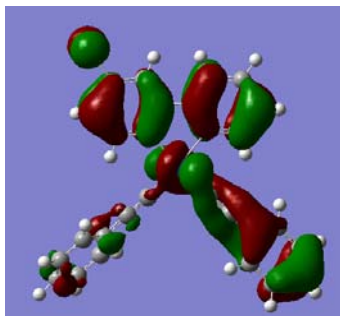

HOMO-7

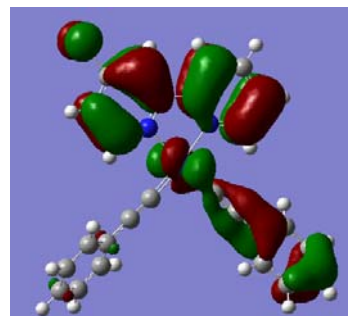

HOMO-8

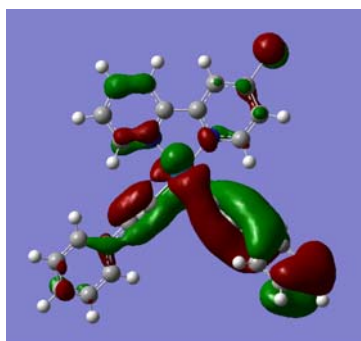

HOMO-9

**Figure S11.** Plots of the frontier molecular orbitals involved in the absorption of **1** in dichloromethane solution (isovalue = 0.02).

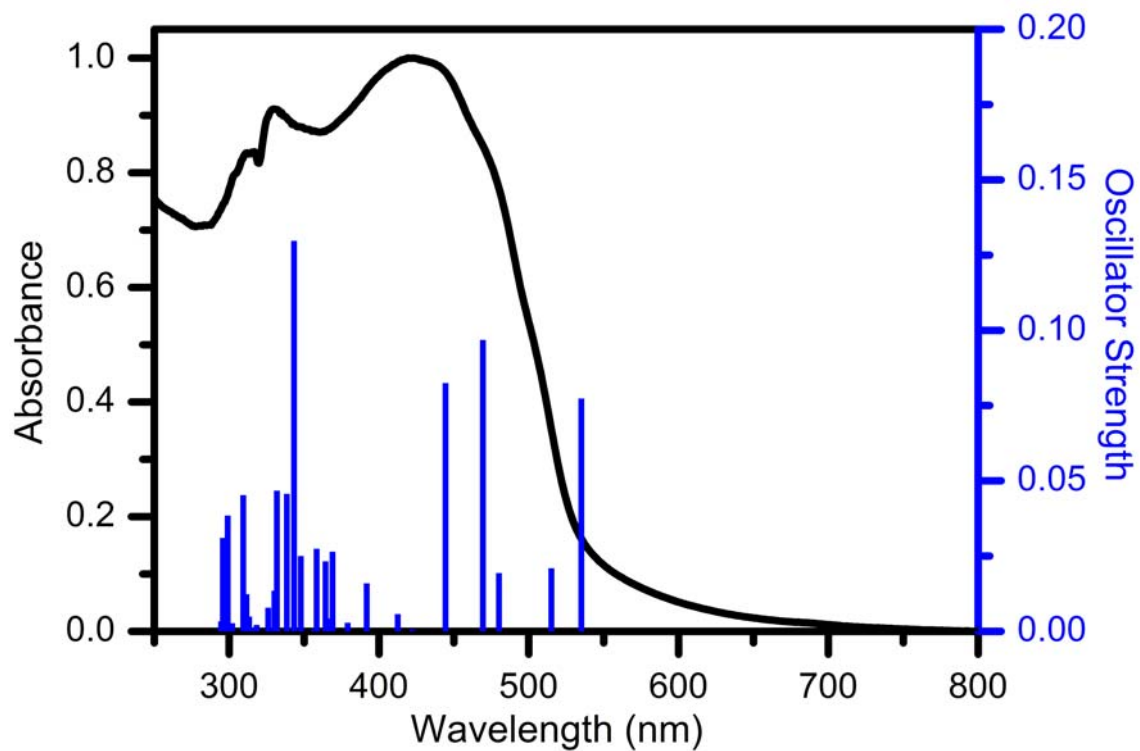

**Figure S12.** Calculated (blue vertical bars) and measured (black line) UV-vis absorption spectra of solid state  $1 \cdot 2(\text{CH}_2\text{Cl}_2)$  at ambient temperature.

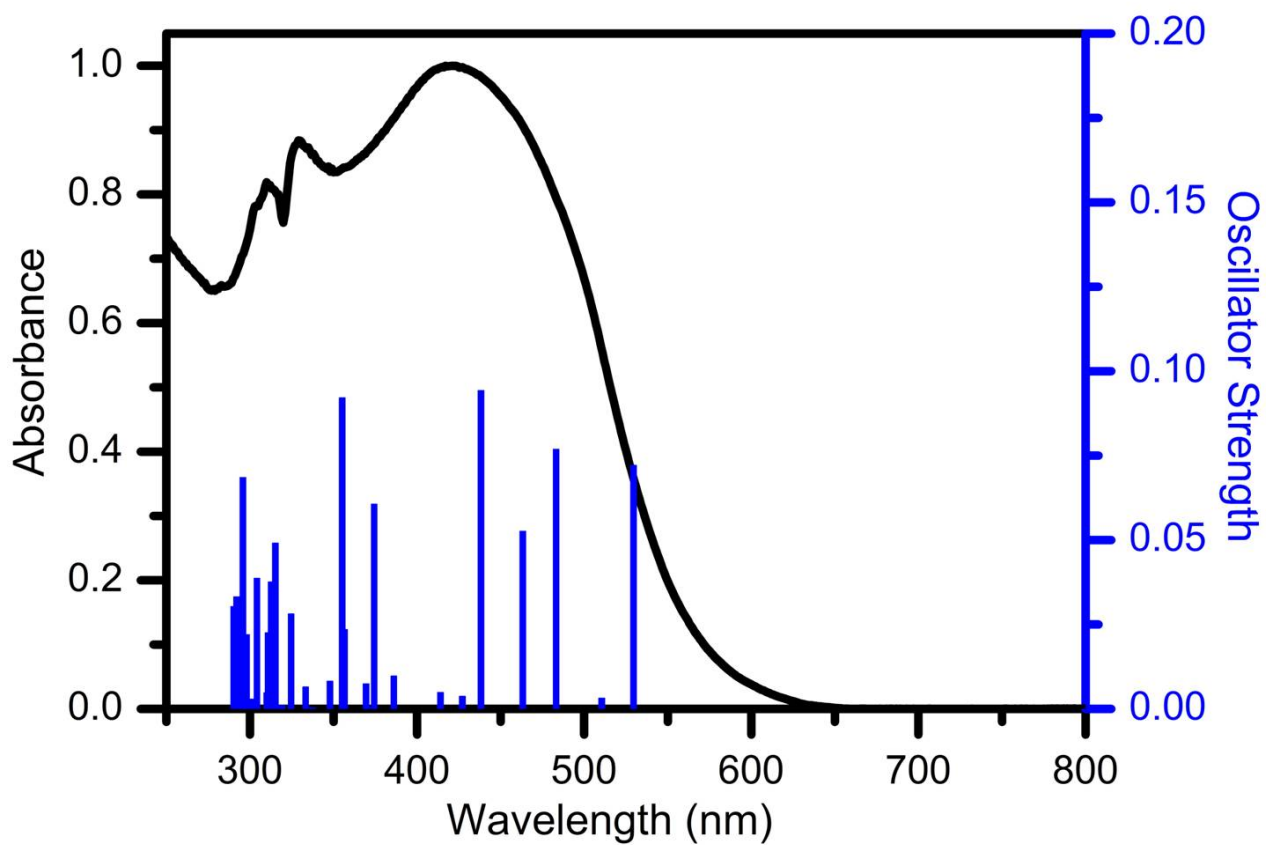

**Figure S13.** Calculated (blue vertical bars) and measured (black line) UV-vis absorption spectra of solid state  $1 \cdot 2(\text{CHCl}_3)$  at ambient temperature.

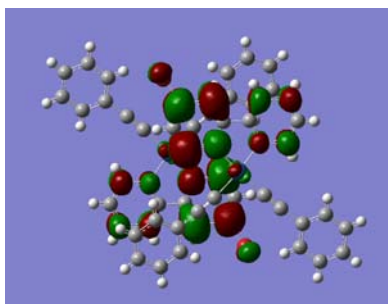

LUMO+5

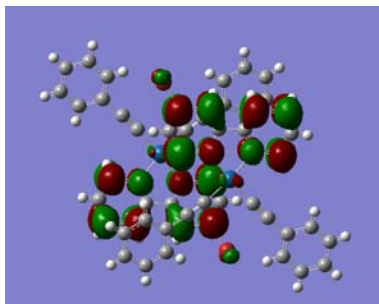

LUMO+4

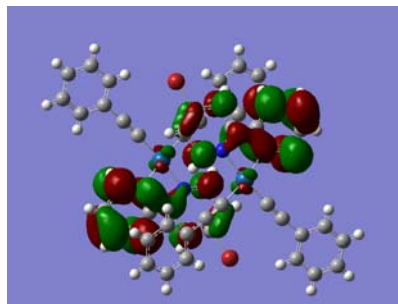

LUMO+3

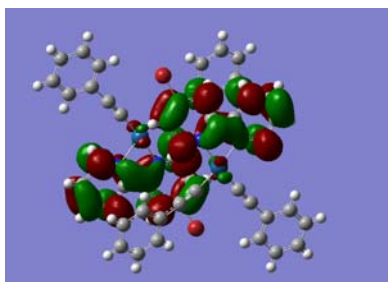

LUMO+2

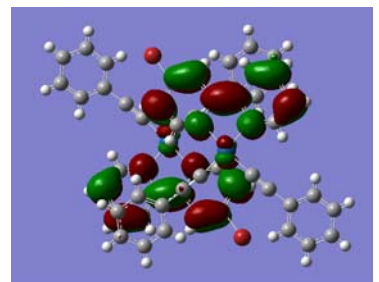

LUMO+1

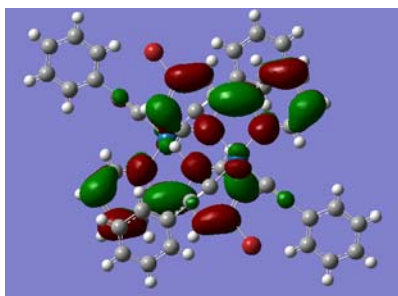

LUMO

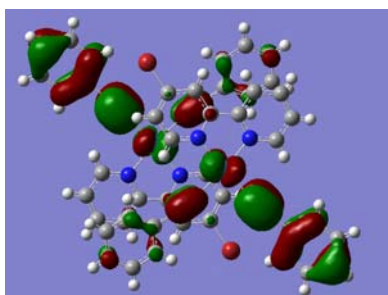

HOMO

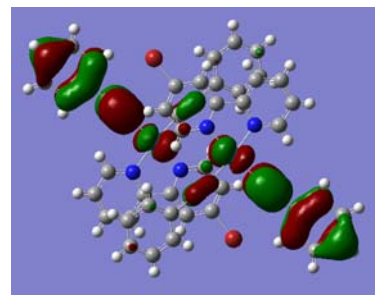

HOMO-1

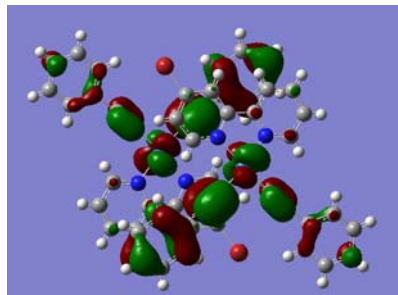

HOMO-2

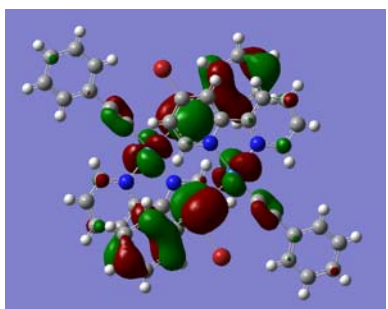

HOMO-3

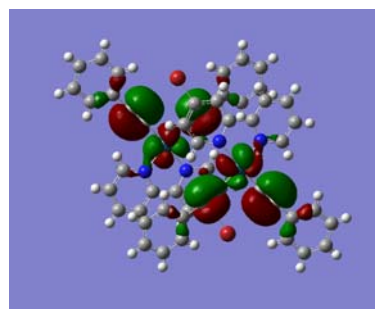

HOMO-4

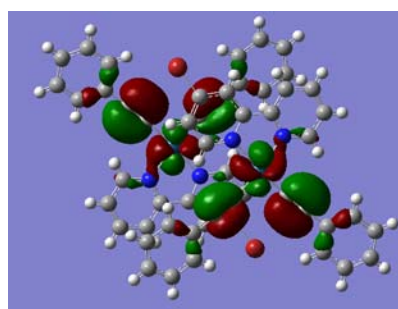

HOMO-5

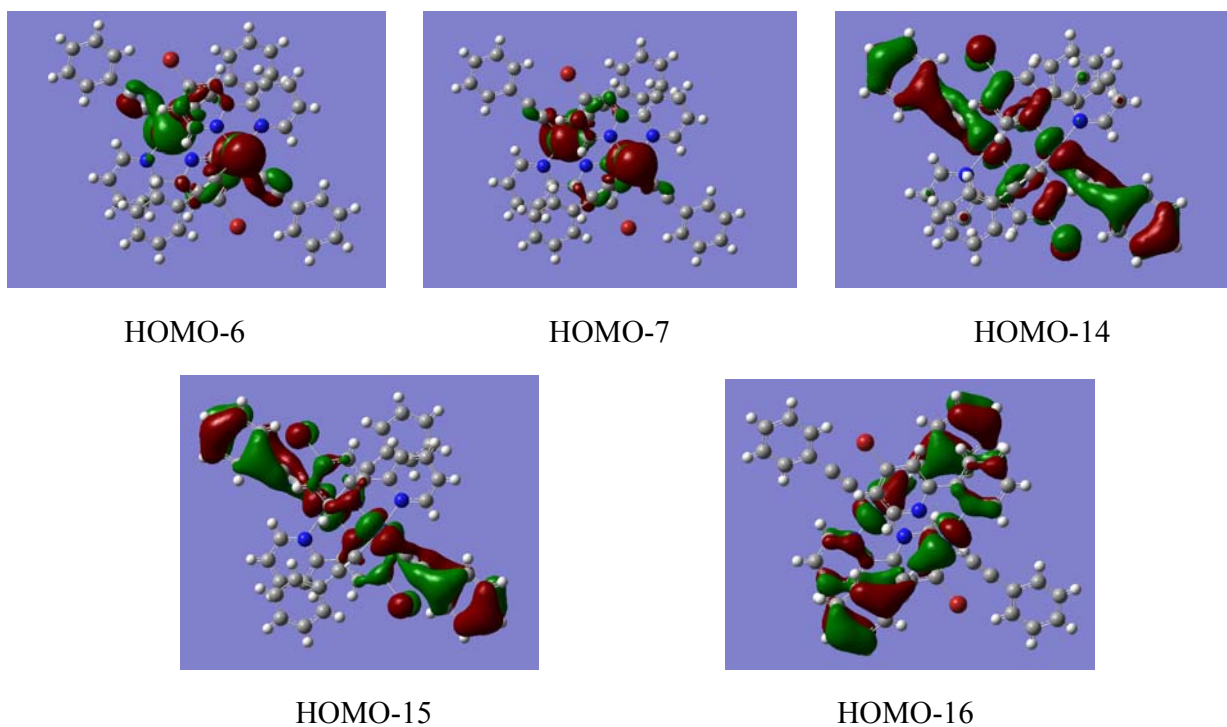

**Figure S14.** Plots of the frontier molecular orbitals involved in the absorption of  $1 \cdot 2(\text{CH}_2\text{Cl}_2)$  in solid state (isovalue = 0.02).



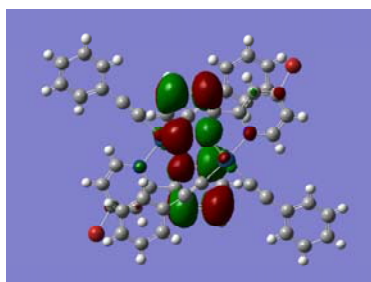

LUMO+5

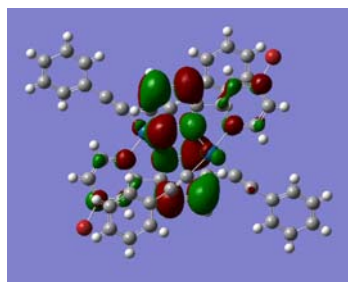

LUMO+4

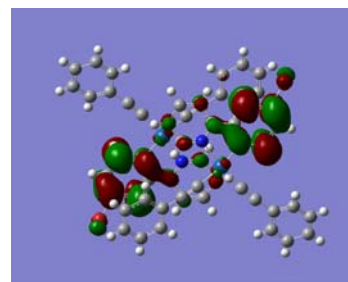

LUMO+3

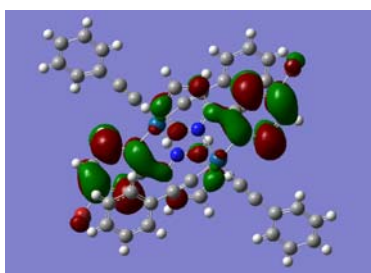

LUMO+2

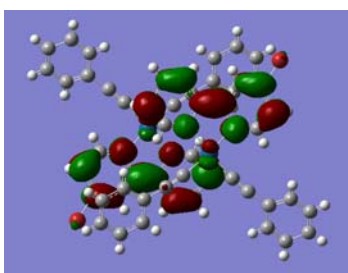

LUMO+1

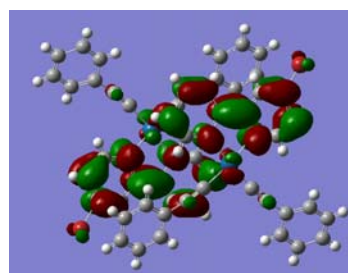

LUMO

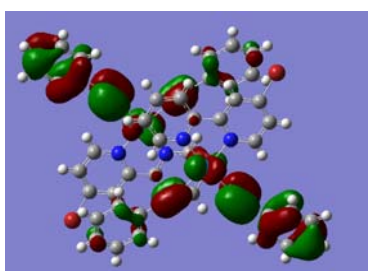

HOMO

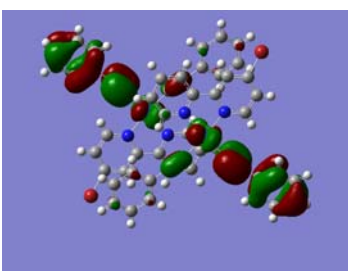

HOMO-1

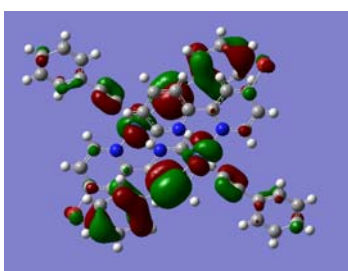

HOMO-2

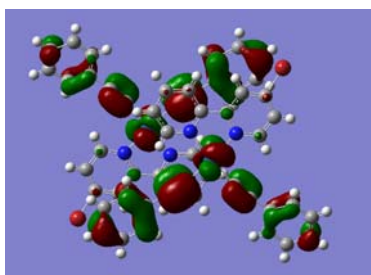

HOMO-3

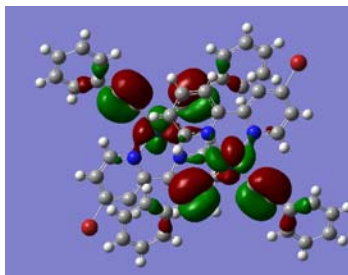

HOMO-4

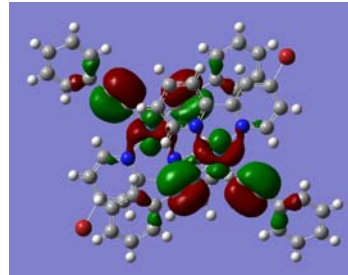

HOMO-5

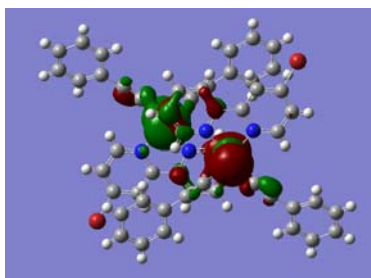

HOMO-6

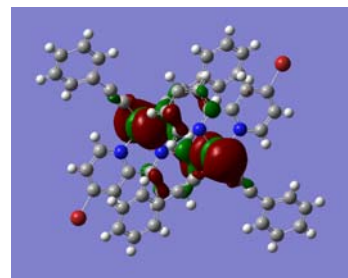

HOMO-7

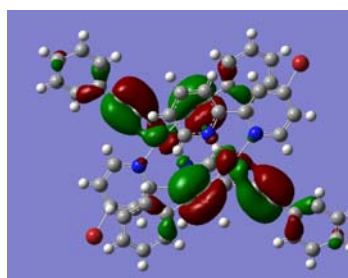

HOMO-9

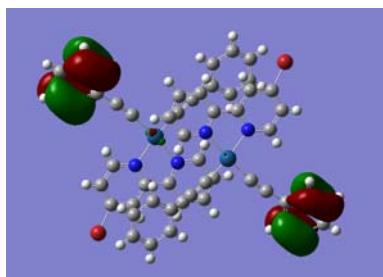

HOMO-12

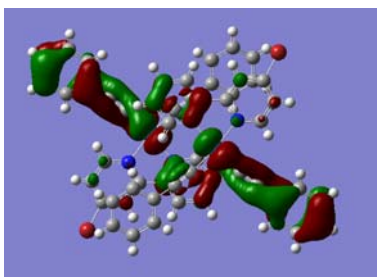

HOMO-14

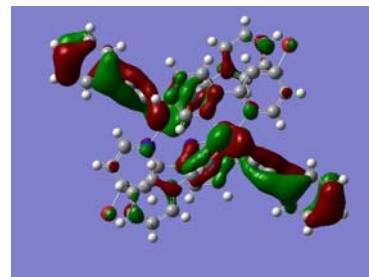

HOMO-16

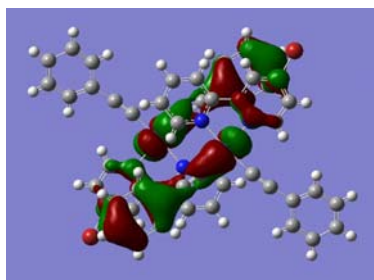

HOMO-17

**Figure S15.** Plots of the frontier molecular orbitals involved in the absorption of  $1 \cdot 2(\text{CHCl}_3)$  in solid state (isovalue = 0.02).

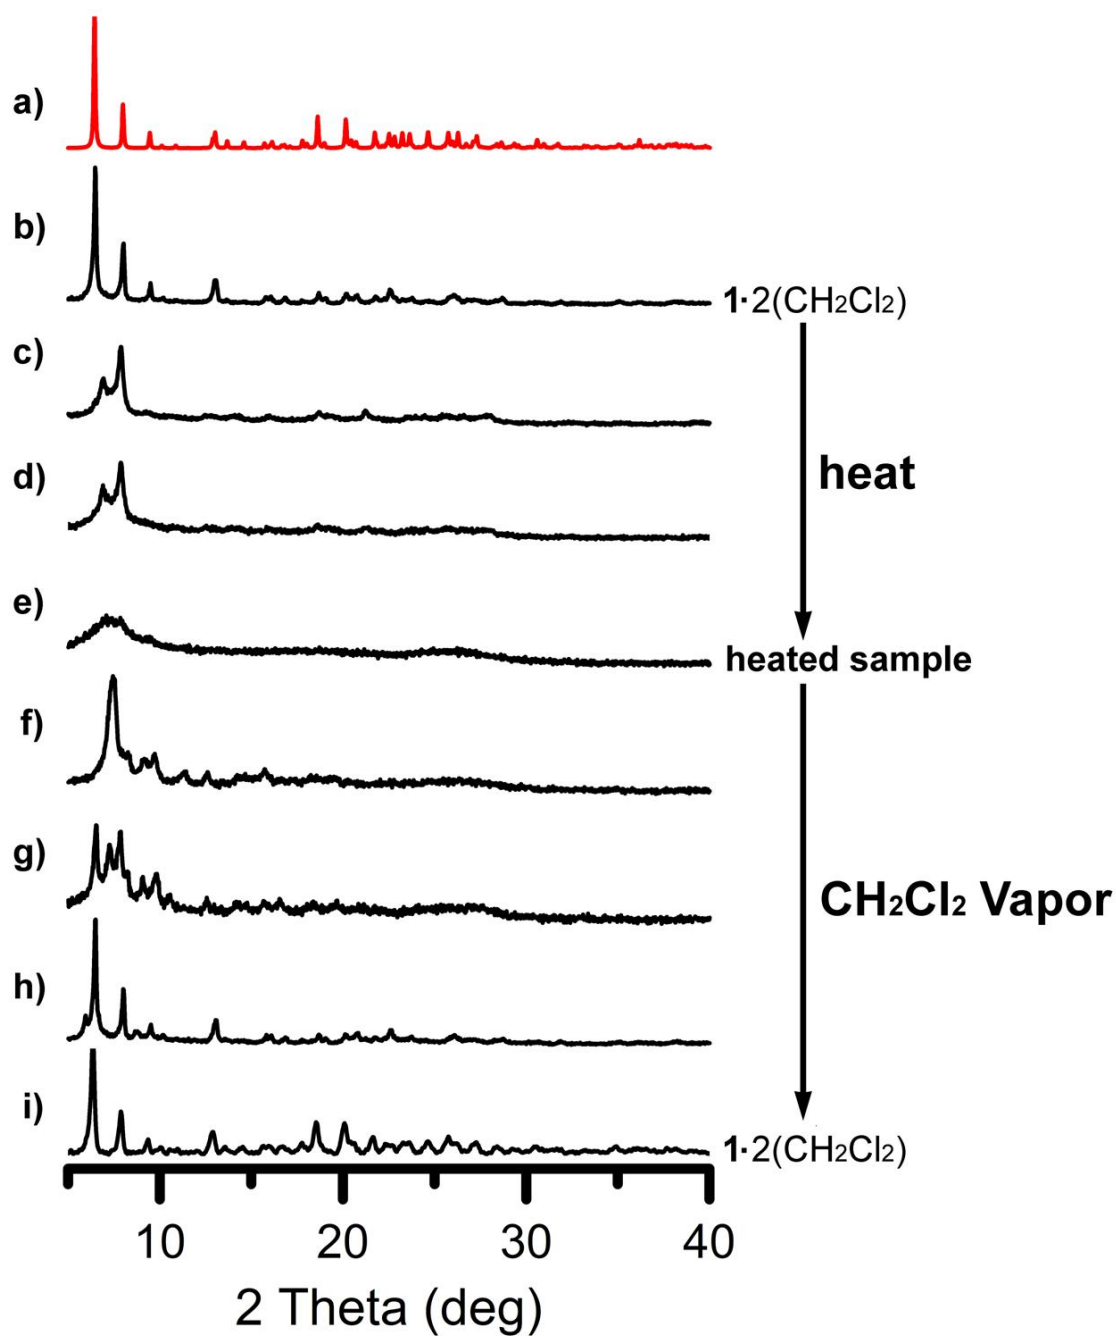

**Figure S16.** The XRD diagrams recorded in a reversible heating-absorbing cycle, showing dynamic variations of XRD patterns from b)-e) in the heating process of  $1 \cdot 2(\text{CH}_2\text{Cl}_2)$ , and the XRD patterns from e)-i) in the reversed process by exposing heated sample into  $\text{CH}_2\text{Cl}_2$  vapor at ambient temperature. a) The simulated pattern of  $1 \cdot 2(\text{CH}_2\text{Cl}_2)$ .

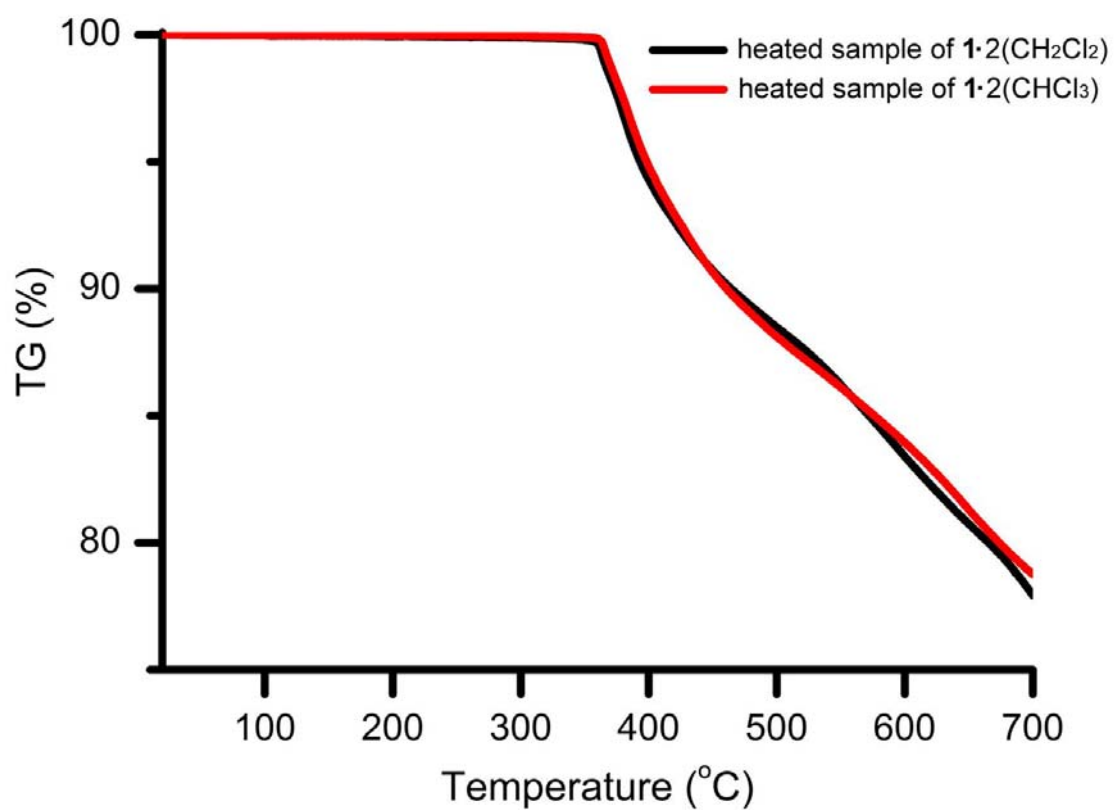

**Figure S17.** Thermogravimetric analysis curves of crystalline species  $1 \cdot 2(\text{CH}_2\text{Cl}_2)$  and  $1 \cdot 2(\text{CHCl}_3)$  after heated at  $100^\circ\text{C}$  for 1 hour.

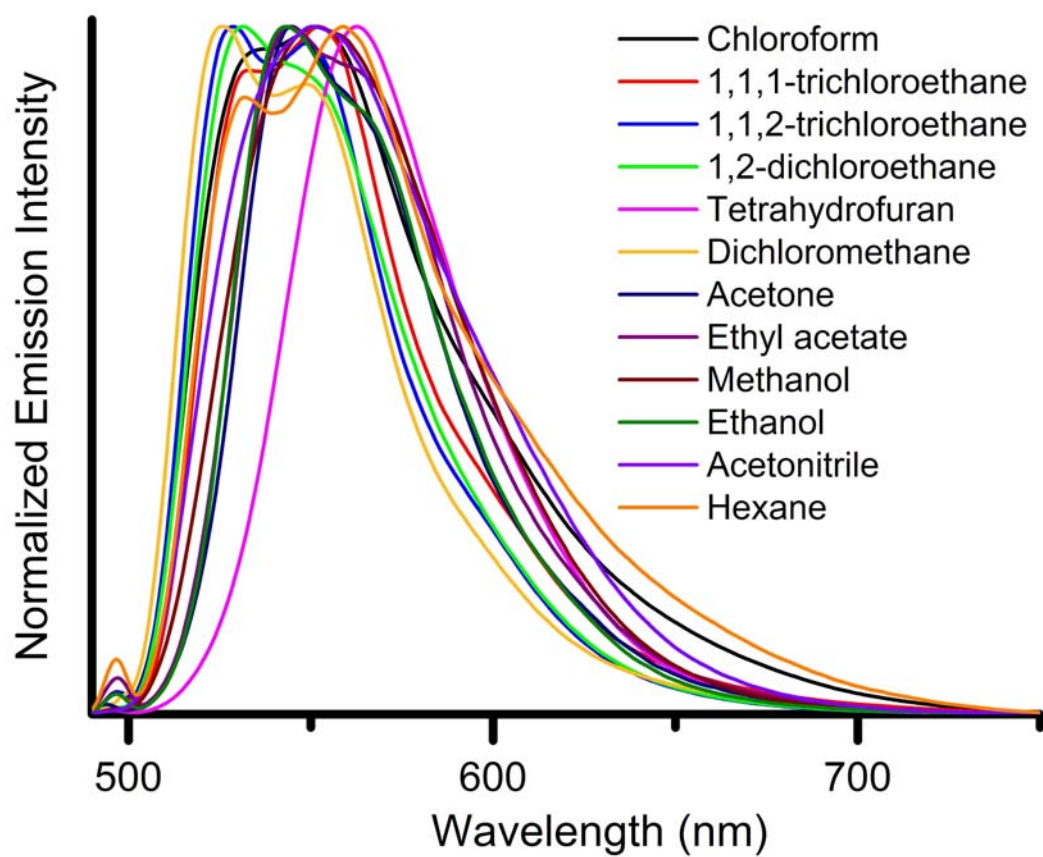

**Figure S18.** Emission spectra of ground sample **1** upon exposure to various VOC vapors at ambient temperature.

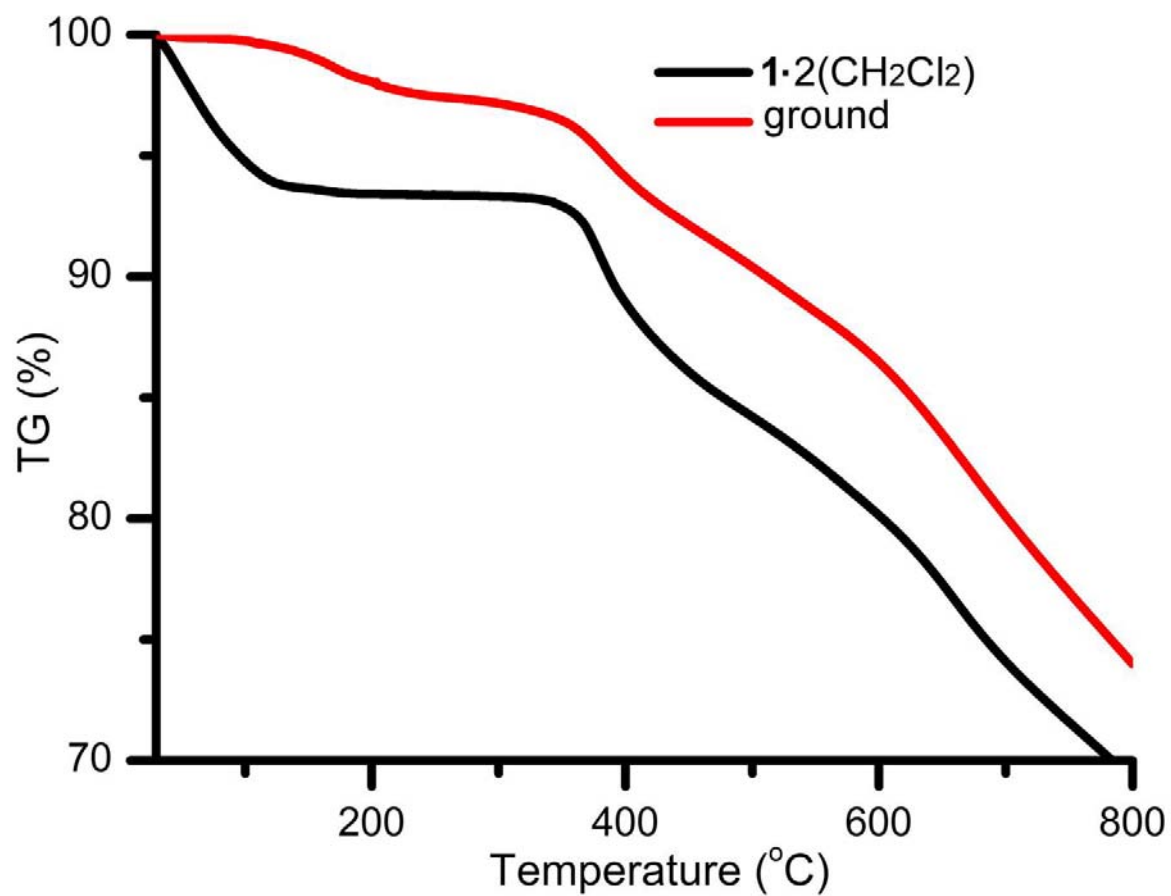

**Figure S19.** Thermogravimetric analysis curves of crystalline  $1\cdot 2(\text{CH}_2\text{Cl}_2)$  (black) and the corresponding ground species (red).

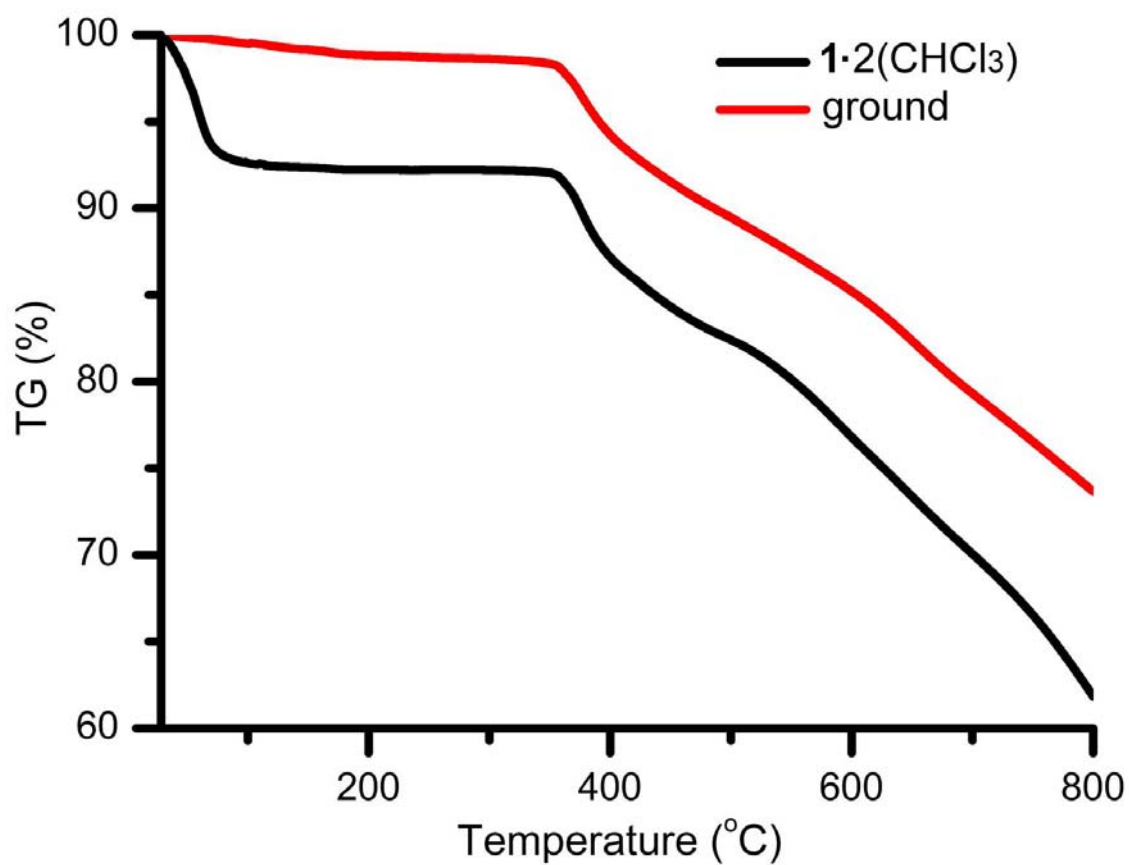

**Figure S20.** Thermogravimetric analysis curves of crystalline  $1\cdot 2(\text{CHCl}_3)$  (black) and the corresponding ground species (red).

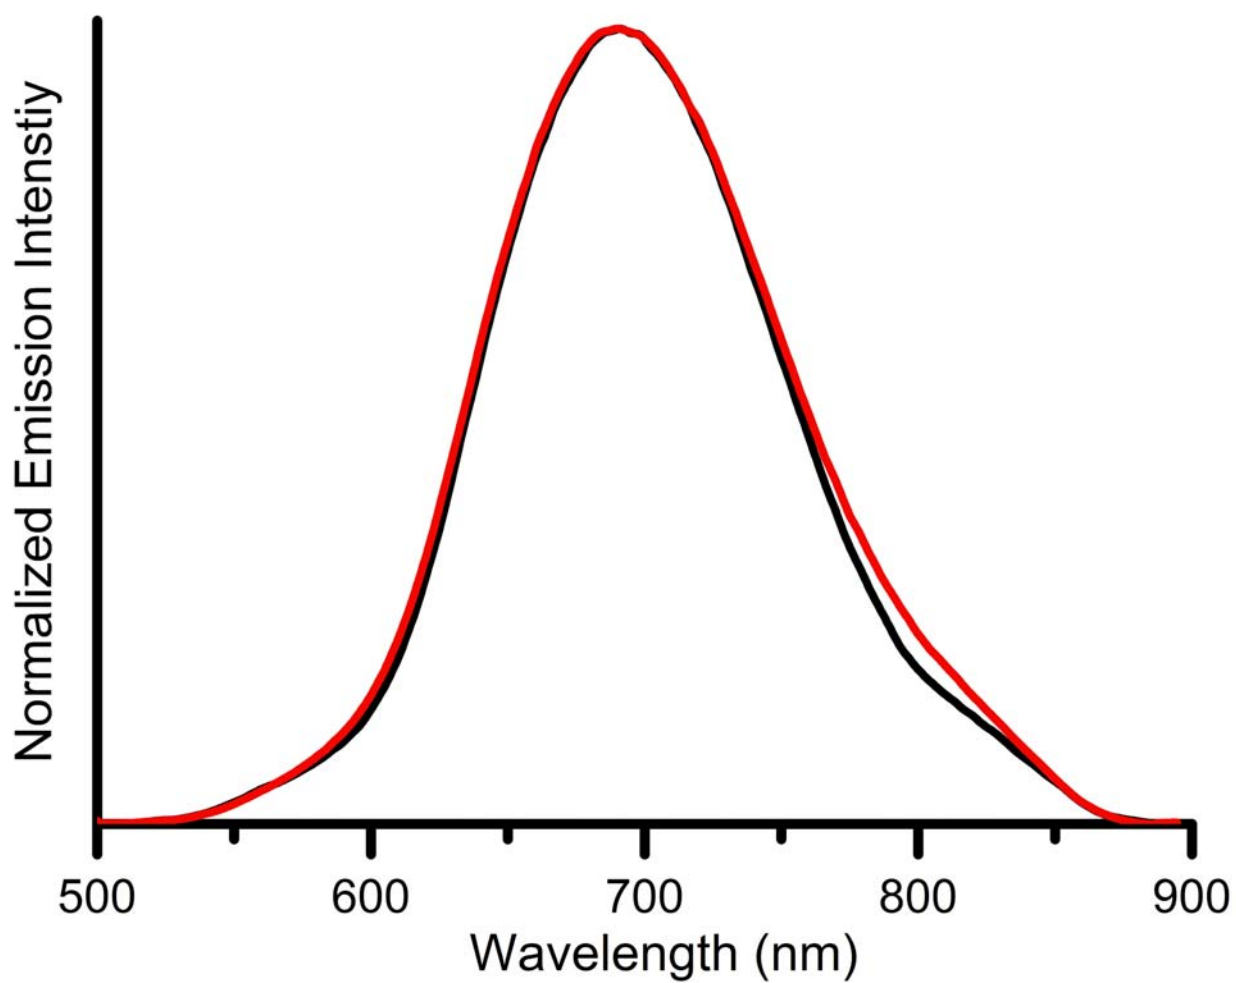

**Figure S21.** The emission spectra of heated-sample of  $1 \cdot 2(\text{CH}_2\text{Cl}_2)$  after ground and heated-sample of  $1 \cdot 2(\text{CHCl}_3)$  after ground (red line).
